# Supplementary material for: A chiral phosphazane reagent strategy for the determination of enantiomeric excess of amines
Source: Royal Society of Chemistry journal article supplement (doi:10.1039/d2sc01692c), 2022-01-01
Supplement: d2sc01692c2.pdf [file d2sc01692c2.pdf]

## A chiral phosphazane reagent strategy for the determination of enantiomeric excess of amines

Andrew J. Peel,<sup>a,\*</sup> Alexandros Terzopoulos,<sup>a</sup> Rajesh B. Jethwa,<sup>a</sup> Dipanjana Choudhury,<sup>a</sup> Hao-Che Niu,<sup>a</sup> Andrew D. Bond,<sup>a</sup> Jonathan Slaughter<sup>a</sup> and Dominic S. Wright<sup>a,\*</sup>

<sup>a</sup> Yusuf Hamied Department of Chemistry, Cambridge University, Lensfield Road, Cambridge CB2 1EW (U.K.)

### Supplementary Information Addendum: Coordinates used in Calculations (ESI, Section 5)

#### Table of Contents

|                                                                       |           |
|-----------------------------------------------------------------------|-----------|
| H <sub>3</sub> PO <sub>4</sub> .....                                  | 2         |
| <b>4-S</b> .....                                                      | <b>2</b>  |
| <i>cis</i> -N <sub>endo</sub> -O <sub>exo</sub> - <b>4-S</b> .....    | 2         |
| <i>cis</i> -N <sub>exo</sub> -O <sub>exo</sub> - <b>4-S</b> .....     | 5         |
| <i>trans</i> -N <sub>exo</sub> -O <sub>exo</sub> - <b>4-S</b> .....   | 8         |
| <i>trans</i> -N <sub>endo</sub> -O <sub>endo</sub> - <b>4-S</b> ..... | 10        |
| <i>trans</i> -N <sub>endo</sub> -O <sub>exo</sub> - <b>4-S</b> .....  | 12        |
| <i>trans</i> -N <sub>exo</sub> -O <sub>endo</sub> - <b>4-S</b> .....  | 14        |
| <b>4-R</b> .....                                                      | <b>16</b> |
| <i>cis</i> -N <sub>endo</sub> -O <sub>exo</sub> - <b>4-R</b> .....    | 16        |
| <i>trans</i> -N <sub>endo</sub> -O <sub>exo</sub> - <b>4-R</b> .....  | 18        |
| <b>5-S</b> .....                                                      | <b>20</b> |
| <i>cis</i> -N <sub>endo</sub> -O <sub>exo</sub> - <b>5-S</b> .....    | 20        |
| <i>trans</i> -N <sub>endo</sub> -O <sub>exo</sub> - <b>5-S</b> .....  | 22        |
| <b>8-R</b> .....                                                      | <b>24</b> |
| <i>cis</i> -N <sub>endo</sub> -O <sub>exo</sub> - <b>8-R</b> .....    | 24        |
| <i>trans</i> -N <sub>endo</sub> -O <sub>exo</sub> - <b>8-R</b> .....  | 26        |
| <b>8-S</b> .....                                                      | <b>28</b> |
| <i>cis</i> -N <sub>endo</sub> -O <sub>exo</sub> - <b>8-S</b> .....    | 28        |
| <i>trans</i> -N <sub>endo</sub> -O <sub>exo</sub> - <b>8-S</b> .....  | 30        |

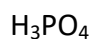

| Element | PBE/TZVP |          |          | B3LYP/TZVP |          |          |
|---------|----------|----------|----------|------------|----------|----------|
|         | x        | y        | z        | x          | y        | Z        |
| P       | 0.000015 | -1E-06   | -0.12439 | 0.000012   | -0.00001 | 0.118561 |
| O       | 0.000219 | -3E-06   | -1.62486 | 0.000128   | -0.00016 | 1.604821 |
| O       | -0.35209 | 1.415866 | 0.607693 | -1.28874   | -0.66269 | -0.59703 |
| H       | -1.11814 | -1.83811 | 0.092857 | 0.629262   | 2.055454 | -0.09563 |
| O       | 1.402107 | -0.40309 | 0.607911 | 1.218259   | -0.7846  | -0.59725 |
| H       | -1.03282 | 1.887362 | 0.092865 | -2.0947    | -0.48276 | -0.09563 |
| O       | -1.05025 | -1.01278 | 0.607611 | 0.070335   | 1.447469 | -0.59694 |
| H       | 2.150876 | -0.04919 | 0.093277 | 1.465417   | -1.57269 | -0.09606 |

Note: to obtain a NMR reference value for the phosphorous atoms, a single-point calculation was done under an implicitly solvated environment (CHCl<sub>3</sub>). The NMR referencing was carried out by subtracting the shift of the atom of interest away from the shift of phosphoric acid.

#### 4-S

##### cis-N<sub>endo</sub>-O<sub>exo</sub>-4-S

| Element | PBE/TZVP  |           |           | PBE/TZVP (CHCl <sub>3</sub> ) |           |           | B3LYP/TZVP (CHCl <sub>3</sub> ) |           |           |
|---------|-----------|-----------|-----------|-------------------------------|-----------|-----------|---------------------------------|-----------|-----------|
|         | x         | y         | z         | x                             | y         | z         | x                               | y         | z         |
| P       | 2.552819  | 1.519292  | 0.331108  | 2.539750                      | 1.531442  | 0.335028  | 2.564183                        | 1.486841  | 0.278179  |
| P       | 0.045086  | 1.311458  | 1.230927  | 0.031141                      | 1.313742  | 1.228029  | 0.109008                        | 1.303331  | 1.274898  |
| O       | -0.946555 | 0.336775  | 0.214560  | -0.950654                     | 0.329967  | 0.217529  | -0.906237                       | 0.382664  | 0.272103  |
| N       | 0.960163  | 2.230908  | 0.076966  | 0.945130                      | 2.236657  | 0.076425  | 0.996395                        | 2.256891  | 0.143981  |
| N       | 1.550872  | 0.416985  | 1.312367  | 1.541644                      | 0.428633  | 1.319189  | 1.600238                        | 0.407613  | 1.299662  |
| C       | 0.562396  | 3.413600  | -0.706339 | 0.541549                      | 3.414648  | -0.712932 | 0.568094                        | 3.420387  | -0.649226 |
| C       | -0.534927 | 4.180033  | 0.050469  | -0.558792                     | 4.179855  | 0.040671  | -0.569527                       | 4.144880  | 0.085196  |
| H       | -1.422053 | 3.550778  | 0.217514  | -1.442885                     | 3.547195  | 0.211511  | -1.435250                       | 3.494957  | 0.224101  |
| H       | -0.851792 | 5.058160  | -0.531294 | -0.879850                     | 5.052652  | -0.546533 | -0.894926                       | 5.009377  | -0.496497 |
| H       | -0.168272 | 4.519518  | 1.029806  | -0.192276                     | 4.527803  | 1.017273  | -0.239212                       | 4.490218  | 1.066445  |
| C       | 1.780585  | 4.330692  | -0.898531 | 1.755036                      | 4.336925  | -0.909357 | 1.748505                        | 4.387260  | -0.819451 |
| H       | 2.589243  | 3.807578  | -1.430523 | 2.566875                      | 3.815458  | -1.438262 | 2.578626                        | 3.909360  | -1.343496 |
| H       | 2.170556  | 4.674810  | 0.070176  | 2.141295                      | 4.690062  | 0.057782  | 2.108212                        | 4.734898  | 0.150649  |
| H       | 1.496056  | 5.210068  | -1.494946 | 1.465187                      | 5.210744  | -1.511091 | 1.437165                        | 5.253494  | -1.406624 |
| C       | 0.031710  | 2.965659  | -2.083464 | 0.012316                      | 2.959337  | -2.087970 | 0.080938                        | 2.953952  | -2.032412 |
| H       | 0.830226  | 2.473956  | -2.655790 | 0.811223                      | 2.465896  | -2.658295 | 0.904422                        | 2.506024  | -2.587092 |
| H       | -0.332138 | 3.825816  | -2.666512 | -0.351781                     | 3.817485  | -2.673534 | -0.309997                       | 3.793001  | -2.613237 |
| H       | -0.791053 | 2.247889  | -1.961261 | -0.810378                     | 2.241967  | -1.962785 | -0.702555                       | 2.204236  | -1.924382 |
| C       | 2.033151  | -0.302093 | 2.514417  | 2.023373                      | -0.287287 | 2.523497  | 2.111346                        | -0.375767 | 2.445990  |
| C       | 3.303314  | -1.077778 | 2.130754  | 3.291081                      | -1.067608 | 2.141003  | 3.331270                        | -1.183207 | 1.980270  |
| H       | 3.100339  | -1.777784 | 1.309779  | 3.083404                      | -1.766242 | 1.319736  | 3.066261                        | -1.839660 | 1.153172  |

|   |           |           |           |           |           |           |           |           |           |
|---|-----------|-----------|-----------|-----------|-----------|-----------|-----------|-----------|-----------|
| H | 3.674924  | -1.644957 | 2.997031  | 3.660183  | -1.635276 | 3.007958  | 3.711727  | -1.790844 | 2.804001  |
| H | 4.103018  | -0.390970 | 1.812105  | 4.093239  | -0.384515 | 1.820365  | 4.139432  | -0.524605 | 1.653185  |
| C | 0.942162  | -1.295351 | 2.943082  | 0.931435  | -1.276683 | 2.959180  | 1.013200  | -1.348550 | 2.897023  |
| H | 0.724182  | -1.998405 | 2.127846  | 0.709923  | -1.984372 | 2.148726  | 0.734848  | -2.011077 | 2.078589  |
| H | 0.012067  | -0.770465 | 3.212504  | 0.002067  | -0.749743 | 3.227089  | 0.120617  | -0.814450 | 3.231387  |
| H | 1.271792  | -1.866397 | 3.823708  | 1.262783  | -1.842609 | 3.842387  | 1.369525  | -1.955172 | 3.732143  |
| C | 2.342668  | 0.670226  | 3.669698  | 2.337179  | 0.687386  | 3.675684  | 2.510541  | 0.538939  | 3.618284  |
| H | 1.439615  | 1.230899  | 3.954827  | 1.435825  | 1.250987  | 3.960653  | 1.650205  | 1.113687  | 3.968048  |
| H | 3.115616  | 1.392655  | 3.366940  | 3.111813  | 1.407009  | 3.370277  | 3.287953  | 1.240857  | 3.309139  |
| H | 2.706571  | 0.128784  | 4.556775  | 2.700560  | 0.146443  | 4.563151  | 2.893694  | -0.047221 | 4.457303  |
| C | -2.253299 | -0.008819 | 0.714379  | -2.258942 | -0.022420 | 0.713660  | -2.219841 | 0.053309  | 0.750281  |
| H | -2.470955 | 0.648379  | 1.575396  | -2.481083 | 0.631087  | 1.575948  | -2.462231 | 0.740521  | 1.565322  |
| C | -2.377069 | -1.509976 | 1.115501  | -2.375833 | -1.524997 | 1.109608  | -2.351784 | -1.424804 | 1.218829  |
| H | -1.443554 | -2.043863 | 0.893211  | -1.440624 | -2.054903 | 0.884270  | -1.424186 | -1.966156 | 1.043487  |
| H | -2.565002 | -1.623476 | 2.193041  | -2.563183 | -1.641871 | 2.186763  | -2.562282 | -1.484493 | 2.287160  |
| C | -3.555596 | -2.012171 | 0.255791  | -3.552466 | -2.029266 | 0.248177  | -3.513541 | -1.965156 | 0.360187  |
| H | -4.028158 | -2.931434 | 0.632111  | -4.022210 | -2.950738 | 0.622342  | -3.994544 | -2.854399 | 0.770423  |
| C | -4.487771 | -0.762833 | 0.203568  | -4.488806 | -0.783077 | 0.198336  | -4.436461 | -0.719847 | 0.221405  |
| C | -3.355821 | 0.170788  | -0.367127 | -3.359650 | 0.156166  | -0.369139 | -3.288570 | 0.177041  | -0.365633 |
| C | -2.883234 | -0.620818 | -1.614619 | -2.883058 | -0.630920 | -1.618097 | -2.788888 | -0.676984 | -1.558870 |
| H | -1.847360 | -0.358504 | -1.867755 | -1.847584 | -0.364678 | -1.869422 | -1.754570 | -0.435924 | -1.798283 |
| H | -3.503593 | -0.367459 | -2.486917 | -3.504339 | -0.377680 | -2.489741 | -3.382108 | -0.468631 | -2.450263 |
| C | -3.045502 | -2.113684 | -1.198963 | -3.041123 | -2.125535 | -1.206493 | -2.971762 | -2.145493 | -1.073518 |
| H | -3.765692 | -2.638796 | -1.842836 | -3.759718 | -2.650223 | -1.852511 | -3.677569 | -2.690642 | -1.701210 |
| H | -2.100430 | -2.673236 | -1.256303 | -2.094193 | -2.682286 | -1.263225 | -2.038660 | -2.709749 | -1.082018 |
| C | -5.040752 | -0.338460 | 1.573225  | -5.044364 | -0.364403 | 1.568842  | -5.026641 | -0.227798 | 1.552584  |
| H | -5.760908 | -1.088344 | 1.936031  | -5.764231 | -1.117134 | 1.926345  | -5.755458 | -0.952932 | 1.923565  |
| H | -5.579805 | 0.618168  | 1.492374  | -5.583806 | 0.592183  | 1.489950  | -5.552264 | 0.719403  | 1.409433  |
| H | -4.273236 | -0.220757 | 2.348249  | -4.278221 | -0.249361 | 2.345719  | -4.290466 | -0.077685 | 2.339807  |
| C | -5.690130 | -0.921396 | -0.737326 | -5.689869 | -0.943090 | -0.744138 | -5.619420 | -0.922119 | -0.735670 |
| H | -6.359000 | -1.712549 | -0.363583 | -6.355392 | -1.737940 | -0.372188 | -6.285527 | -1.695145 | -0.343437 |
| H | -5.412448 | -1.180109 | -1.766509 | -5.410475 | -1.197658 | -1.773966 | -5.327081 | -1.218487 | -1.740810 |
| H | -6.276089 | 0.009918  | -0.775878 | -6.278445 | -0.013277 | -0.779824 | -6.201625 | -0.001517 | -0.821467 |
| C | -3.721800 | 1.617526  | -0.642846 | -3.731655 | 1.602071  | -0.641591 | -3.641093 | 1.606427  | -0.726569 |
| H | -2.860832 | 2.166350  | -1.051459 | -2.873116 | 2.155472  | -1.049367 | -2.776816 | 2.122867  | -1.145757 |
| H | -4.042249 | 2.135779  | 0.274694  | -4.053784 | 2.116430  | 0.277487  | -3.973581 | 2.169648  | 0.149117  |
| H | -4.536502 | 1.689121  | -1.379506 | -4.547198 | 1.670823  | -1.377574 | -4.437463 | 1.636956  | -1.473610 |
| N | 2.891197  | 0.700656  | -1.142408 | 2.895390  | 0.710720  | -1.129559 | 2.797291  | 0.696124  | -1.216744 |
| H | 3.884016  | 0.630001  | -1.360303 | 3.889530  | 0.652724  | -1.346908 | 3.767695  | 0.599161  | -1.483470 |
| C | 2.013384  | -0.223140 | -1.872919 | 2.026583  | -0.216391 | -1.867261 | 1.867106  | -0.208953 | -1.902514 |
| H | 0.985506  | 0.101664  | -1.648068 | 0.995167  | 0.098725  | -1.645337 | 0.865164  | 0.128252  | -1.636243 |
| C | 2.251745  | -0.099333 | -3.383186 | 2.270686  | -0.085652 | -3.376074 | 2.036787  | -0.092081 | -3.420645 |
| H | 2.097421  | 0.936802  | -3.715786 | 2.106911  | 0.949934  | -3.705961 | 1.878523  | 0.935895  | -3.747627 |
| H | 1.566543  | -0.756973 | -3.937126 | 1.592878  | -0.746880 | -3.934969 | 1.322508  | -0.738171 | -3.934368 |
| H | 3.280262  | -0.393906 | -3.645203 | 3.303474  | -0.368265 | -3.633249 | 3.041451  | -0.394879 | -3.726014 |
| C | 2.144321  | -1.668130 | -1.407433 | 2.168703  | -1.661806 | -1.405551 | 2.003619  | -1.651580 | -1.439456 |

|   |          |           |           |          |           |           |          |           |           |
|---|----------|-----------|-----------|----------|-----------|-----------|----------|-----------|-----------|
| C | 3.362473 | -2.358256 | -1.487857 | 3.395781 | -2.338005 | -1.479121 | 3.193361 | -2.362088 | -1.610872 |
| H | 4.249758 | -1.857205 | -1.885179 | 4.280099 | -1.825423 | -1.867576 | 4.047038 | -1.885693 | -2.079713 |
| C | 3.464870 | -3.680254 | -1.048014 | 3.509441 | -3.660533 | -1.041769 | 3.306597 | -3.675932 | -1.167982 |
| H | 4.422620 | -4.201453 | -1.110325 | 4.473530 | -4.170702 | -1.098449 | 4.239009 | -4.211550 | -1.301114 |
| C | 2.344009 | -4.336259 | -0.527188 | 2.391807 | -4.330856 | -0.530213 | 2.224720 | -4.302708 | -0.551977 |
| H | 2.424271 | -5.368621 | -0.181044 | 2.481252 | -5.362988 | -0.185369 | 2.313068 | -5.324864 | -0.204532 |
| C | 1.123797 | -3.658751 | -0.450190 | 1.162898 | -3.667104 | -0.460377 | 1.033601 | -3.603147 | -0.382715 |
| H | 0.243642 | -4.159937 | -0.039628 | 0.285696 | -4.178705 | -0.056530 | 0.188866 | -4.077976 | 0.103003  |
| C | 1.028683 | -2.334770 | -0.887068 | 1.056329 | -2.342873 | -0.895879 | 0.928606 | -2.287064 | -0.823047 |
| H | 0.090901 | -1.784290 | -0.792756 | 0.110756 | -1.804462 | -0.807708 | 0.022338 | -1.722654 | -0.656425 |

*cis*-N<sub>exo</sub>-O<sub>exo</sub>-4-S

| Element | PBE/TZVP  |           |           | PBE/TZVP (CHCl3) |           |           | B3LYP/TZVP (CHCl3) |          |          |
|---------|-----------|-----------|-----------|------------------|-----------|-----------|--------------------|----------|----------|
|         | X         | y         | z         | x                | y         | z         | x                  | y        | z        |
| P       | -1.841153 | 1.656902  | 0.463968  | -1.828412        | 1.601768  | 0.512210  | -                  | 1.690447 | 0.448875 |
| P       | 0.716472  | 1.329258  | 1.181119  | 0.737767         | 1.242032  | 1.179243  | 1.818477           | -        | -        |
| O       | 1.404888  | 0.122414  | 0.171577  | 1.459315         | 0.108652  | 0.112408  | 0.707424           | 1.370331 | 1.210784 |
| N       | -0.833329 | 0.641336  | 1.511065  | -0.804447        | 0.520433  | 1.473912  | -                  | 0.716681 | 1.551801 |
| N       | -0.236397 | 2.279656  | 0.042369  | -0.227396        | 2.237425  | 0.089492  | 0.846190           | -        | -        |
| C       | -1.193633 | -0.505311 | 2.361106  | -1.156050        | -0.664192 | 2.275581  | -                  | 2.320068 | 0.074942 |
| C       | -0.257131 | -0.534525 | 3.580065  | -0.209981        | -0.750389 | 3.484268  | 0.218080           | -        | -        |
| H       | 0.794837  | -0.637215 | 3.272667  | 0.840144         | -0.832623 | 3.165013  | -                  | -        | 2.377144 |
| H       | -0.502428 | -1.390773 | 4.225593  | -0.447419        | -1.639306 | 4.086937  | 1.219917           | 0.443436 | -        |
| H       | -0.352491 | 0.390269  | 4.167222  | -0.306369        | 0.142614  | 4.118833  | -                  | -        | 3.609576 |
| C       | -2.644034 | -0.331241 | 2.837967  | -2.602564        | -0.517702 | 2.773081  | 0.305351           | 0.496823 | -        |
| H       | -3.341686 | -0.317100 | 1.987401  | -3.309571        | -0.465587 | 1.931647  | 0.742135           | -        | 3.323865 |
| H       | -2.762262 | 0.604030  | 3.403866  | -2.717550        | 0.388283  | 3.385711  | -                  | 0.613005 | -        |
| H       | -2.929396 | -1.174817 | 3.483505  | -2.877656        | -1.391779 | 3.381337  | 0.573749           | -        | 4.237334 |
| C       | -1.064136 | -1.821626 | 1.567666  | -1.031021        | -1.939680 | 1.417089  | -                  | 1.348793 | -        |
| H       | -1.745716 | -1.821590 | 0.706202  | -1.720136        | -1.895416 | 0.562181  | -                  | 0.416328 | 4.200275 |
| H       | -1.313428 | -2.686789 | 2.201503  | -1.274192        | -2.835169 | 2.009818  | 0.398933           | -        | -        |
| H       | -0.038657 | -1.940874 | 1.192485  | -0.007871        | -2.038783 | 1.028916  | -                  | -        | 2.838072 |
| C       | 0.043337  | 3.682608  | -0.332826 | 0.049451         | 3.660529  | -0.215131 | 2.674666           | 0.278413 | -        |
| C       | -0.896646 | 4.067912  | -1.486925 | -0.900273        | 4.105931  | -1.339049 | -                  | -        | 1.988448 |
| H       | -0.770211 | 3.380362  | -2.334941 | -0.777603        | 3.468577  | -2.226056 | 3.359198           | 0.257162 | -        |
| H       | -0.683693 | 5.093718  | -1.822808 | -0.690819        | 5.149209  | -1.618014 | -                  | 0.643049 | 3.409668 |
| H       | -1.949727 | 4.026849  | -1.169249 | -1.951187        | 4.045468  | -1.017132 | 2.799615           | -        | -        |
| C       | 1.501342  | 3.761677  | -0.812690 | 1.503191         | 3.765730  | -0.702616 | -                  | -        | 3.467840 |
| H       | 1.663966  | 3.090843  | -1.667556 | 1.660505         | 3.140427  | -1.592370 | 2.961622           | 1.122725 | -        |
| H       | 2.197418  | 3.473458  | -0.009237 | 2.207548         | 3.439021  | 0.078627  | -                  | -        | 1.567911 |
| H       | 1.747913  | 4.789462  | -1.117377 | 1.744099         | 4.808417  | -0.956552 | 1.080636           | 1.745621 | -        |
| C       | -0.168560 | 4.642426  | 0.854685  | -0.151837        | 4.557708  | 1.021911  | -                  | -        | 0.701235 |
| H       | 0.505082  | 4.381332  | 1.684649  | 0.528450         | 4.254563  | 1.832058  | 1.740519           | 1.729027 | -        |
| H       | -1.204926 | 4.578325  | 1.219065  | -1.185561        | 4.477328  | 1.390779  | -                  | -        | 2.049010 |
| C       | 0.030081  | 5.685781  | 0.564097  | 0.046637         | 5.613626  | 0.781842  | 1.158181           | 2.769441 | -        |
| C       | 2.838519  | 0.062937  | 0.079064  | 2.899148         | 0.058712  | 0.067024  | 0.102814           | -        | 1.102312 |
| H       | 3.261083  | 0.699274  | 0.877923  | 3.287617         | 0.658817  | 0.909342  | -                  | 1.953853 | -        |
| C       | 3.368012  | 0.493336  | -1.321580 | 3.472834         | 0.560639  | -1.291035 | 0.190862           | 3.636433 | -        |
| H       |           |           |           |                  |           |           | -                  | -        | 0.286973 |
| H       |           |           |           |                  |           |           | 0.739262           | 3.974602 | -        |
| H       |           |           |           |                  |           |           | -                  | -        | 1.461765 |
| H       |           |           |           |                  |           |           | 0.609684           | 3.255448 | -        |
| H       |           |           |           |                  |           |           | -                  | -        | 2.271972 |
| H       |           |           |           |                  |           |           | 0.519057           | 4.974721 | -        |
| H       |           |           |           |                  |           |           | -                  | -        | 1.840715 |
| H       |           |           |           |                  |           |           | 1.787284           | 3.957851 | -        |
| H       |           |           |           |                  |           |           | -                  | -        | 1.153856 |
| H       |           |           |           |                  |           |           | 1.647963           | 3.690352 | -        |
| H       |           |           |           |                  |           |           | -                  | -        | 0.768344 |
| H       |           |           |           |                  |           |           | 1.812060           | 2.975474 | -        |
| H       |           |           |           |                  |           |           | -                  | -        | 1.574937 |
| H       |           |           |           |                  |           |           | 2.341764           | 3.457207 | 0.042853 |
| H       |           |           |           |                  |           |           | 1.887377           | 4.691289 | -        |
| H       |           |           |           |                  |           |           | -                  | -        | 1.132987 |
| H       |           |           |           |                  |           |           | 0.018304           | 4.651374 | 0.851306 |
| H       |           |           |           |                  |           |           | 0.641115           | 4.423567 | 1.691459 |
| H       |           |           |           |                  |           |           | -                  | 4.619101 | 1.207952 |
| H       |           |           |           |                  |           |           | 1.049859           | -        | -        |
| H       |           |           |           |                  |           |           | 0.195560           | 5.668609 | 0.513756 |
| C       |           |           |           |                  |           |           | 2.919422           | 0.001910 | 0.073537 |
| H       |           |           |           |                  |           |           | 3.375604           | 0.613068 | 0.857755 |
| C       |           |           |           |                  |           |           | 3.409182           | 0.446012 | -        |

|   |           |           |           |           |           |           |          |          |          |
|---|-----------|-----------|-----------|-----------|-----------|-----------|----------|----------|----------|
|   |           |           |           |           |           |           |          |          | 1.333985 |
| H | 2.522713  | 0.707654  | -1.990546 | 2.651989  | 0.799034  | -1.981908 | 2.554807 | 0.668116 | -        |
|   |           |           |           |           |           |           |          |          | 1.973110 |
| H | 3.980180  | 1.404817  | -1.260764 | 4.071635  | 1.473840  | -1.162753 | 4.021653 | 1.346447 | -        |
|   |           |           |           |           |           |           |          |          | 1.279230 |
| C | 4.180048  | -0.733886 | -1.786427 | 4.315270  | -0.635017 | -1.783495 | 4.202857 | -        | -        |
|   |           |           |           |           |           |           |          | 0.779012 | 1.833903 |
| H | 4.916876  | -0.515337 | -2.573412 | 5.078151  | -0.371556 | -2.530746 | 4.918720 | -        | -        |
|   |           |           |           |           |           |           |          | 0.553714 | 2.625860 |
| C | 4.780140  | -1.267477 | -0.448396 | 4.871686  | -1.226511 | -0.451214 | 4.825505 | -        | -        |
|   |           |           |           |           |           |           |          | 1.338583 | 0.520857 |
| C | 3.370257  | -1.389359 | 0.240017  | 3.438478  | -1.395037 | 0.177879  | 3.432855 | -        | 0.194582 |
|   |           |           |           |           |           |           |          | 1.455438 | -        |
| C | 2.587645  | -2.260285 | -0.777521 | 2.704919  | -2.223958 | -0.908513 | 2.619587 | -        | -        |
|   |           |           |           |           |           |           |          | 2.302281 | 0.817362 |
| H | 1.508981  | -2.076816 | -0.690363 | 1.621174  | -2.058139 | -0.851860 | 1.553923 | -        | -        |
|   |           |           |           |           |           |           |          | 2.111888 | 0.709391 |
| H | 2.754647  | -3.328528 | -0.574677 | 2.879392  | -3.298601 | -0.751096 | 2.778724 | -        | -        |
|   |           |           |           |           |           |           |          | 3.366296 | 0.636405 |
| C | 3.160514  | -1.832353 | -2.161512 | 3.322484  | -1.723679 | -2.248637 | 3.168373 | -        | -        |
|   |           |           |           |           |           |           |          | 1.861715 | 2.206233 |
| H | 3.644346  | -2.672434 | -2.680642 | 3.834558  | -2.533761 | -2.787861 | 3.631980 | -        | -        |
|   |           |           |           |           |           |           |          | 2.692953 | 2.738967 |
| H | 2.383618  | -1.441671 | -2.835026 | 2.566274  | -1.308222 | -2.930897 | 2.387754 | -        | -        |
|   |           |           |           |           |           |           |          | 1.459787 | 2.854289 |
| C | 5.747223  | -0.288216 | 0.235456  | 5.802216  | -0.272306 | 0.314256  | 5.822792 | -        | 0.152924 |
|   |           |           |           |           |           |           |          | 0.382618 | -        |
| H | 6.674078  | -0.203100 | -0.353086 | 6.749642  | -0.153652 | -0.234360 | 6.730625 | -        | -        |
|   |           |           |           |           |           |           |          | 0.310250 | 0.451453 |
| H | 6.028365  | -0.657134 | 1.234058  | 6.047622  | -0.685621 | 1.304867  | 6.113623 | -        | 1.134497 |
|   |           |           |           |           |           |           |          | 0.764674 | -        |
| H | 5.344398  | 0.724821  | 0.358573  | 5.385623  | 0.731019  | 0.467847  | 5.446976 | 0.628965 | 0.293295 |
| C | 5.518215  | -2.606079 | -0.587088 | 5.629203  | -2.550073 | -0.625981 | 5.550731 | -        | -        |
|   |           |           |           |           |           |           |          | 2.680345 | 0.694256 |
| H | 6.405613  | -2.482914 | -1.227747 | 6.538346  | -2.386031 | -1.225673 | 6.411926 | -        | -        |
|   |           |           |           |           |           |           |          | 2.554357 | 1.355811 |
| H | 4.903109  | -3.403933 | -1.021024 | 5.040161  | -3.331757 | -1.121355 | 4.926511 | -        | -        |
|   |           |           |           |           |           |           |          | 3.467139 | 1.112552 |
| H | 5.870913  | -2.956106 | 0.395415  | 5.948321  | -2.943533 | 0.351577  | 5.926588 | -        | 0.267923 |
|   |           |           |           |           |           |           |          | 3.036639 | -        |
| C | 3.325829  | -1.903682 | 1.667235  | 3.350543  | -1.980080 | 1.575547  | 3.413187 | -        | 1.611852 |
|   |           |           |           |           |           |           |          | 1.993013 | -        |
| H | 2.287832  | -1.949912 | 2.029425  | 2.300936  | -2.065473 | 1.894601  | 2.390401 | -        | 1.991063 |
|   |           |           |           |           |           |           |          | 2.034375 | -        |
| H | 3.888579  | -1.249628 | 2.351658  | 3.873223  | -1.350072 | 2.312239  | 3.993979 | -        | 2.287910 |
|   |           |           |           |           |           |           |          | 1.360501 | -        |
| H | 3.744814  | -2.918986 | 1.739554  | 3.788810  | -2.989104 | 1.613055  | 3.822504 | -        | 1.654954 |
|   |           |           |           |           |           |           |          | 3.004884 | -        |
| N | -2.204456 | 0.789823  | -0.974241 | -2.257376 | 0.817387  | -0.951204 | -        | 0.579333 | -        |
|   |           |           |           |           |           |           |          | 2.167226 | 0.750360 |
| H | -3.564772 | 0.451003  | -1.394396 | -3.643520 | 0.549786  | -1.343917 | -        | 0.517273 | -        |
|   |           |           |           |           |           |           |          | 3.467005 | 1.431789 |
| C | -4.229660 | 1.108600  | -0.807855 | -4.264538 | 1.219565  | -0.724718 | -        | 1.345166 | -        |
|   |           |           |           |           |           |           |          | 4.060731 | 1.035319 |
| H | -3.766659 | 0.765504  | -2.883251 | -3.866463 | 0.910210  | -2.818880 | -        | 0.719264 | -        |
|   |           |           |           |           |           |           |          | 3.308984 | 2.941088 |
| C | -3.553953 | 1.826374  | -3.075688 | -3.613557 | 1.965777  | -2.991765 | -        | 1.684854 | -        |
|   |           |           |           |           |           |           |          | 2.842718 | 3.141986 |
| H | -4.797120 | 0.540988  | -3.195351 | -4.913870 | 0.740243  | -3.107781 | -        | 0.682725 | -        |
|   |           |           |           |           |           |           |          | 4.279962 | 3.438973 |
| H | -3.088701 | 0.162667  | -3.506871 | -3.231866 | 0.292962  | -3.473139 | -        | -        | -        |
|   |           |           |           |           |           |           |          | 2.678801 | 0.060437 |
| H | -3.936681 | -0.989206 | -1.056699 | -4.071431 | -0.881282 | -1.033283 | -        | -        | 3.375147 |
|   |           |           |           |           |           |           |          | 4.191184 | 0.775040 |
| C | -3.244650 | -2.066498 | -1.632062 | -3.425783 | -1.974378 | -1.633195 | -        | -        | -        |
|   |           |           |           |           |           |           |          | 3.660624 | 2.015199 |
| C | -2.442710 | -1.877488 | -2.350981 | -2.617531 | -1.805027 | -2.349731 | -        | -        | 1.446273 |
|   |           |           |           |           |           |           |          | -        | -        |
|   |           |           |           |           |           |           |          | 2.738009 | 2.062389 |
|   |           |           |           |           |           |           |          | -        | 2.013302 |

|          |           |           |           |           |           |           |          |          |          |
|----------|-----------|-----------|-----------|-----------|-----------|-----------|----------|----------|----------|
| <b>H</b> | -3.554478 | -3.382877 | -1.286659 | -3.791888 | -3.283960 | -1.315208 | -        | -        | -        |
|          |           |           |           |           |           |           | 4.293145 | 3.196848 | 1.078263 |
| <b>C</b> | -2.999745 | -4.207682 | -1.738850 | -3.273365 | -4.121844 | -1.786042 | -        | -        | -        |
|          |           |           |           |           |           |           | 3.864433 | 4.149426 | 1.365724 |
| <b>H</b> | -4.568075 | -3.645966 | -0.358676 | -4.815777 | -3.523536 | -0.391063 | -        | -        | -        |
|          |           |           |           |           |           |           | 5.473388 | 3.158153 | 0.337621 |
| <b>C</b> | -4.807977 | -4.675167 | -0.084870 | -5.099312 | -4.547240 | -0.138921 | -        | -        | -        |
|          |           |           |           |           |           |           | 5.965654 | 4.078584 | 0.048382 |
| <b>H</b> | -5.270196 | -2.583167 | 0.214034  | -5.472179 | -2.443700 | 0.205340  | -        | -        | 0.028355 |
|          |           |           |           |           |           |           | 6.012609 | 1.929488 |          |
| <b>C</b> | -6.063280 | -2.777617 | 0.939176  | -6.272327 | -2.619437 | 0.927536  | -        | -        | 0.606063 |
|          |           |           |           |           |           |           | 6.928241 | 1.888000 |          |
| <b>H</b> | -4.955035 | -1.266196 | -0.135752 | -5.100750 | -1.133575 | -0.116596 | -        | -        | -        |
|          |           |           |           |           |           |           | 5.372736 | 0.748010 | 0.341472 |
| <b>C</b> | -5.503028 | -0.437117 | 0.320766  | -5.612186 | -0.292097 | 0.359079  | -        | 0.205763 | -        |
|          |           |           |           |           |           |           | 5.793591 |          | 0.042758 |
| <b>H</b> | -1.446626 | 0.266979  | -1.418174 | -1.536119 | 0.296961  | -1.454558 | -        | -        | -        |
|          |           |           |           |           |           |           | 1.449701 | 0.024819 | 1.133850 |

*trans*-N<sub>exo</sub>-O<sub>exo</sub>-4-S

| Element | PBE/TZVP  |           |           | PBE/TZVP (CHCl3) |           |           | B3LYP/TZVP (CHCl3) |           |           |
|---------|-----------|-----------|-----------|------------------|-----------|-----------|--------------------|-----------|-----------|
|         | X         | y         | z         | x                | y         | z         | x                  | y         | z         |
| P       | -1.376580 | 0.700328  | 0.592807  | -1.391347        | 0.708828  | 0.587367  | -1.388210          | 0.713037  | 0.623473  |
| P       | 0.683144  | 0.234334  | -1.049875 | 0.687322         | 0.235521  | -1.028745 | 0.670087           | 0.232686  | -1.002067 |
| O       | 1.962534  | 0.058152  | 0.100766  | 1.961041         | 0.043770  | 0.124760  | 1.963902           | 0.056876  | 0.090120  |
| N       | -0.658256 | -0.618597 | -0.329837 | -0.658940        | -0.614408 | -0.317868 | -0.638455          | -0.622093 | -0.249521 |
| N       | -0.177545 | 1.601744  | -0.371914 | -0.174523        | 1.605133  | -0.359679 | -0.157762          | 1.597627  | -0.316963 |
| C       | -1.161141 | -1.981554 | -0.574092 | -1.166924        | -1.972838 | -0.585272 | -1.161954          | -1.971083 | -0.531344 |
| C       | 0.032466  | -2.911225 | -0.843845 | 0.026122         | -2.922455 | -0.777266 | 0.017218           | -2.943521 | -0.675075 |
| H       | 0.614972  | -2.567249 | -1.713109 | 0.664896         | -2.594483 | -1.612578 | 0.681126           | -2.645192 | -1.490194 |
| H       | -0.321863 | -3.929949 | -1.059901 | -0.331021        | -3.937091 | -1.007254 | -0.348385          | -3.948386 | -0.896126 |
| H       | 0.699699  | -2.949192 | 0.026872  | 0.640312         | -2.963926 | 0.131789  | 0.599536           | -2.978841 | 0.244897  |
| C       | -1.914727 | -2.469121 | 0.675072  | -2.000926        | -2.441460 | 0.619094  | -2.045337          | -2.423475 | 0.641163  |
| H       | -2.795338 | -1.842858 | 0.879899  | -2.880708        | -1.799322 | 0.771160  | -2.919684          | -1.781100 | 0.753658  |
| H       | -1.256991 | -2.451290 | 1.555928  | -1.395490        | -2.434012 | 1.537071  | -1.480416          | -2.414692 | 1.575219  |
| H       | -2.269244 | -3.499044 | 0.520688  | -2.361635        | -3.466026 | 0.445836  | -2.402346          | -3.439579 | 0.462266  |
| C       | -2.110773 | -2.001674 | -1.791407 | -2.041401        | -1.984575 | -1.856980 | -1.990765          | -1.973504 | -1.829984 |
| H       | -3.004852 | -1.394796 | -1.593602 | -2.930726        | -1.354810 | -1.718533 | -2.864941          | -1.331748 | -1.725490 |
| H       | -2.441919 | -3.028239 | -2.013096 | -2.380383        | -3.006261 | -2.088499 | -2.338028          | -2.982658 | -2.065665 |
| H       | -1.599739 | -1.603560 | -2.680809 | -1.469842        | -1.606365 | -2.717845 | -1.388560          | -1.614276 | -2.667379 |
| C       | 0.315102  | 2.967564  | -0.116507 | 0.316921         | 2.972618  | -0.103784 | 0.324778           | 2.971208  | -0.096362 |
| C       | -0.905599 | 3.889543  | 0.051907  | -0.903788        | 3.894649  | 0.062330  | -0.894577          | 3.888874  | 0.084048  |
| H       | -1.553806 | 3.843391  | -0.834748 | -1.546297        | 3.856407  | -0.828814 | -1.553334          | 3.831541  | -0.783560 |
| H       | -0.576623 | 4.928816  | 0.199753  | -0.572782        | 4.931976  | 0.218178  | -0.567940          | 4.922944  | 0.211247  |
| H       | -1.501816 | 3.597575  | 0.930144  | -1.507417        | 3.599268  | 0.934357  | -1.471851          | 3.610811  | 0.968768  |
| C       | 1.122133  | 3.419435  | -1.343968 | 1.127270         | 3.424495  | -1.329021 | 1.105173           | 3.418157  | -1.340909 |
| H       | 0.492799  | 3.410832  | -2.245535 | 0.499505         | 3.419110  | -2.231802 | 0.467196           | 3.385757  | -2.225946 |
| H       | 1.982736  | 2.757698  | -1.521482 | 1.987811         | 2.762120  | -1.505351 | 1.970720           | 2.778496  | -1.520702 |
| H       | 1.507349  | 4.438250  | -1.191245 | 1.513106         | 4.442499  | -1.173520 | 1.468150           | 4.439228  | -1.208913 |
| C       | 1.187953  | 3.038972  | 1.151828  | 1.187904         | 3.043625  | 1.165861  | 1.223998           | 3.060093  | 1.149266  |
| H       | 2.067529  | 2.392072  | 1.049591  | 2.067197         | 2.395444  | 1.065567  | 2.093367           | 2.415919  | 1.036216  |
| H       | 0.616729  | 2.696027  | 2.027315  | 0.614098         | 2.704690  | 2.041455  | 0.676447           | 2.735149  | 2.036492  |
| H       | 1.522015  | 4.071413  | 1.338739  | 1.523083         | 4.075905  | 1.350489  | 1.560667           | 4.087274  | 1.310512  |
| C       | 3.152719  | -0.613510 | -0.347517 | 3.155495         | -0.619532 | -0.334090 | 3.149784           | -0.613111 | -0.357774 |
| H       | 3.092004  | -0.716435 | -1.446657 | 3.088550         | -0.714868 | -1.433141 | 3.092271           | -0.707897 | -1.446117 |
| C       | 3.360678  | -2.000554 | 0.332943  | 3.371239         | -2.010517 | 0.334238  | 3.351118           | -2.003338 | 0.310096  |
| H       | 2.593849  | -2.155268 | 1.104961  | 2.608731         | -2.177439 | 1.107801  | 2.591470           | -2.162148 | 1.074477  |
| H       | 3.274925  | -2.824385 | -0.390136 | 3.285705         | -2.827682 | -0.396150 | 3.262448           | -2.813120 | -0.414492 |
| C       | 4.774197  | -1.894817 | 0.944626  | 4.787087         | -1.903102 | 0.940024  | 4.765645           | -1.905350 | 0.919121  |
| H       | 5.252585  | -2.865471 | 1.142408  | 5.270230         | -2.872967 | 1.129334  | 5.238996           | -2.870956 | 1.103757  |
| C       | 5.519791  | -0.986430 | -0.080924 | 5.524231         | -0.985920 | -0.083726 | 5.509880           | -0.988297 | -0.094833 |
| C       | 4.448517  | 0.162673  | 0.021736  | 4.450003         | 0.159552  | 0.032000  | 4.440995           | 0.156411  | 0.020216  |
| C       | 4.393620  | 0.417667  | 1.551973  | 4.404813         | 0.405513  | 1.563637  | 4.388236           | 0.397780  | 1.551191  |
| H       | 3.417008  | 0.827234  | 1.839121  | 3.430542         | 0.815497  | 1.858876  | 3.421917           | 0.802926  | 1.843074  |
| H       | 5.155540  | 1.154762  | 1.846024  | 5.169660         | 1.139992  | 1.856407  | 5.147396           | 1.122633  | 1.848807  |



|   |           |           |           |           |           |           |           |           |           |
|---|-----------|-----------|-----------|-----------|-----------|-----------|-----------|-----------|-----------|
| C | 4.658577  | -0.981168 | 2.183214  | 4.674202  | -0.997262 | 2.184954  | 4.652957  | -1.007058 | 2.167494  |
| H | 5.581542  | -0.991681 | 2.781021  | 5.599802  | -1.008680 | 2.778613  | 5.570481  | -1.022988 | 2.757154  |
| H | 3.841668  | -1.304375 | 2.844618  | 3.860382  | -1.326941 | 2.847229  | 3.843706  | -1.333611 | 2.822507  |
| C | 5.664210  | -1.612889 | -1.476876 | 5.662813  | -1.602675 | -1.484743 | 5.658072  | -1.601736 | -1.496342 |
| H | 6.388781  | -2.441445 | -1.442474 | 6.389335  | -2.429803 | -1.458237 | 6.380019  | -2.421790 | -1.465341 |
| H | 6.049736  | -0.872759 | -2.195238 | 6.043371  | -0.856268 | -2.199254 | 6.038913  | -0.857861 | -2.200429 |
| H | 4.728515  | -2.014816 | -1.885076 | 4.726016  | -2.003944 | -1.891239 | 4.733714  | -2.001321 | -1.908913 |
| C | 6.924204  | -0.560189 | 0.368457  | 6.929949  | -0.558442 | 0.360766  | 6.917247  | -0.570498 | 0.353624  |
| H | 7.575554  | -1.443678 | 0.459975  | 7.583953  | -1.441218 | 0.439242  | 7.556321  | -1.453097 | 0.442247  |
| H | 6.936980  | -0.036226 | 1.332084  | 6.947300  | -0.043674 | 1.329341  | 6.938373  | -0.050907 | 1.309294  |
| H | 7.382351  | 0.107158  | -0.377890 | 7.380179  | 0.117598  | -0.382584 | 7.372496  | 0.089861  | -0.388429 |
| C | 4.683285  | 1.410122  | -0.810005 | 4.676999  | 1.412085  | -0.794412 | 4.672293  | 1.411807  | -0.797284 |
| H | 3.896331  | 2.155220  | -0.622905 | 3.890074  | 2.155074  | -0.598458 | 3.888023  | 2.145247  | -0.604218 |
| H | 4.681447  | 1.186181  | -1.888372 | 4.668903  | 1.193325  | -1.873768 | 4.673452  | 1.198333  | -1.869200 |
| H | 5.645905  | 1.880955  | -0.558069 | 5.640761  | 1.882290  | -0.545799 | 5.627020  | 1.876656  | -0.540787 |
| N | -2.904711 | 0.955820  | -0.152222 | -2.905974 | 0.963590  | -0.184988 | -2.890452 | 0.952771  | -0.177356 |
| H | -4.176464 | 1.281472  | 0.506555  | -4.188514 | 1.293318  | 0.450436  | -4.183891 | 1.289224  | 0.431912  |
| C | -3.931923 | 1.429328  | 1.572465  | -3.960778 | 1.489039  | 1.512002  | -3.981748 | 1.499790  | 1.485373  |
| H | -4.776166 | 2.581878  | -0.039724 | -4.801440 | 2.559679  | -0.157405 | -4.780911 | 2.547051  | -0.204012 |
| C | -4.076194 | 3.415330  | 0.109651  | -4.114521 | 3.409075  | -0.039495 | -4.097170 | 3.388331  | -0.084608 |
| H | -5.724438 | 2.815183  | 0.465967  | -5.755424 | 2.801683  | 0.332978  | -5.736417 | 2.796654  | 0.261144  |
| H | -4.983308 | 2.501437  | -1.118009 | -5.000135 | 2.425636  | -1.231872 | -4.956334 | 2.397955  | -1.272011 |
| H | -5.136299 | 0.098795  | 0.421351  | -5.134959 | 0.097253  | 0.404307  | -5.128316 | 0.096198  | 0.377401  |
| C | -5.699043 | -0.292120 | -0.803420 | -5.629753 | -0.388072 | -0.816633 | -5.555688 | -0.423855 | -0.847108 |
| C | -5.489561 | 0.284018  | -1.708694 | -5.368408 | 0.116220  | -1.750665 | -5.239627 | 0.043781  | -1.772457 |
| H | -6.520278 | -1.418069 | -0.886417 | -6.447369 | -1.519512 | -0.857558 | -6.373107 | -1.546780 | -0.897705 |
| C | -6.945994 | -1.709954 | -1.848843 | -6.819361 | -1.886204 | -1.816684 | -6.690222 | -1.939818 | -1.856241 |
| H | -6.798054 | -2.171412 | 0.259206  | -6.789429 | -2.183493 | 0.326471  | -6.781990 | -2.168735 | 0.280846  |
| C | -7.439742 | -3.052293 | 0.194734  | -7.427291 | -3.069006 | 0.294650  | -7.416970 | -3.045363 | 0.242285  |
| H | -6.249575 | -1.788104 | 1.485389  | -6.308580 | -1.705342 | 1.548427  | -6.367491 | -1.656379 | 1.505553  |
| C | -6.460248 | -2.369269 | 2.385643  | -6.568675 | -2.216538 | 2.477783  | -6.677451 | -2.133522 | 2.427522  |
| H | -5.424521 | -0.661793 | 1.561928  | -5.486677 | -0.573503 | 1.583170  | -5.545331 | -0.532056 | 1.549781  |
| C | -4.986421 | -0.373016 | 2.521328  | -5.102105 | -0.210679 | 2.540296  | -5.215263 | -0.146464 | 2.508029  |
| H | -2.942572 | 0.945508  | -1.174258 | -2.924123 | 0.955232  | -1.207523 | -2.888440 | 0.940916  | -1.190801 |

*trans*-N<sub>endo</sub>-O<sub>endo</sub>-4-S

| Element | PBE/TZVP  |           |           | B3LYP/TZVP |           |           | B3LYP/TZVP (CHCl3) |           |           |
|---------|-----------|-----------|-----------|------------|-----------|-----------|--------------------|-----------|-----------|
|         | x         | y         | z         | x          | y         | z         | x                  | y         | z         |
| P       | 0.680335  | 0.388325  | 1.061442  | 0.733057   | 0.411898  | 1.17928   | 0.729391           | 0.405711  | 1.158762  |
| P       | -0.256858 | 0.210321  | -1.455953 | -0.187573  | 0.159002  | -1.32443  | -0.196358          | 0.162009  | -1.339134 |
| O       | -1.90816  | -0.190986 | -1.297793 | -1.833165  | -0.176963 | -1.248637 | -1.844476          | -0.178649 | -1.262278 |
| N       | 0.046073  | 1.43215   | -0.237434 | 0.091607   | 1.406195  | -0.136134 | 0.086335           | 1.404443  | -0.153675 |
| N       | 0.611194  | -0.759919 | -0.280357 | 0.560166   | -0.801225 | -0.078515 | 0.559475           | -0.802933 | -0.106583 |
| C       | -0.145951 | 2.891239  | -0.335529 | -0.092438  | 2.86378   | -0.27421  | -0.09875           | 2.864077  | -0.285791 |
| C       | -1.545704 | 3.222293  | -0.885124 | -1.526108  | 3.193675  | -0.722996 | -1.529602          | 3.193792  | -0.742339 |
| H       | -1.722605 | 2.728016  | -1.851712 | -1.786704  | 2.66854   | -1.642611 | -1.781637          | 2.677165  | -1.669363 |
| H       | -1.647227 | 4.307551  | -1.035702 | -1.626901  | 4.265802  | -0.905847 | -1.629973          | 4.26727   | -0.916054 |
| H       | -2.329881 | 2.899391  | -0.188236 | -2.247608  | 2.913204  | 0.042997  | -2.256011          | 2.905018  | 0.015737  |
| C       | -0.005494 | 3.510191  | 1.064035  | 0.155834   | 3.536848  | 1.082776  | 0.138967           | 3.528942  | 1.07696   |
| H       | 0.990181  | 3.323283  | 1.490194  | 1.168098   | 3.357935  | 1.443714  | 1.147731           | 3.346868  | 1.44601   |
| H       | -0.757261 | 3.094239  | 1.751155  | -0.54453   | 3.165235  | 1.833401  | -0.570065          | 3.155562  | 1.818634  |
| H       | -0.154394 | 4.598212  | 1.007728  | 0.014224   | 4.61515   | 0.990137  | 0.000522           | 4.607756  | 0.987592  |
| C       | 0.904056  | 3.491947  | -1.29388  | 0.883983   | 3.420018  | -1.328209 | 0.88504            | 3.425626  | -1.329329 |
| H       | 1.922603  | 3.301646  | -0.933369 | 1.91762    | 3.23342   | -1.045209 | 1.916509           | 3.233319  | -1.042549 |
| H       | 0.770667  | 4.580297  | -1.392919 | 0.751939   | 4.498107  | -1.447506 | 0.755792           | 4.504872  | -1.439202 |
| H       | 0.806067  | 3.042998  | -2.293549 | 0.707531   | 2.949237  | -2.297473 | 0.711981           | 2.964109  | -2.303808 |
| C       | 0.986123  | -2.187773 | -0.3758   | 0.917576   | -2.235158 | -0.096692 | 0.923721           | -2.235263 | -0.134984 |
| C       | 1.011926  | -2.803429 | 1.032524  | 0.719051   | -2.83462  | 1.304395  | 0.742728           | -2.841628 | 1.265338  |
| H       | 1.74272   | -2.285873 | 1.672295  | 1.359459   | -2.336679 | 2.0357    | 1.387681           | -2.343195 | 1.99239   |
| H       | 1.307537  | -3.861194 | 0.972893  | 0.986338   | -3.89334  | 1.296361  | 1.01576            | -3.898672 | 1.24944   |
| H       | 0.025834  | -2.743305 | 1.514021  | -0.313544  | -2.740028 | 1.637843  | -0.287717          | -2.754715 | 1.608071  |
| C       | 2.381102  | -2.315056 | -1.017524 | 2.385588   | -2.412111 | -0.512376 | 2.388405           | -2.401    | -0.567247 |
| H       | 3.146528  | -1.843245 | -0.391641 | 3.052121   | -1.956895 | 0.215307  | 3.058872           | -1.942014 | 0.154483  |
| H       | 2.392996  | -1.825529 | -2.002537 | 2.568846   | -1.939863 | -1.478576 | 2.557171           | -1.92397  | -1.534022 |
| H       | 2.653139  | -3.37326  | -1.154769 | 2.64042    | -3.471947 | -0.593296 | 2.648184           | -3.459199 | -0.653752 |
| C       | -0.01797  | -2.946896 | -1.26387  | 0.035454   | -2.979316 | -1.113621 | 0.035921           | -2.981511 | -1.14527  |
| H       | -0.045009 | -2.522339 | -2.279019 | 0.195377   | -2.596919 | -2.124117 | 0.183364           | -2.594912 | -2.156173 |
| H       | -1.038151 | -2.914033 | -0.862451 | -1.024701  | -2.886611 | -0.886796 | -1.022172          | -2.897361 | -0.905478 |
| H       | 0.290103  | -3.99934  | -1.349416 | 0.297667   | -4.038936 | -1.115572 | 0.3054             | -4.039167 | -1.153294 |
| C       | -2.708538 | -0.050158 | -0.107153 | -2.694571  | -0.040146 | -0.108454 | -2.697631          | -0.044591 | -0.112602 |
| H       | -2.437403 | 0.908688  | 0.357333  | -2.430577  | 0.889871  | 0.388912  | -2.426749          | 0.883353  | 0.384465  |
| C       | -2.602039 | -1.194843 | 0.947445  | -2.668432  | -1.212863 | 0.91324   | -2.661154          | -1.221654 | 0.903652  |
| H       | -1.961296 | -2.005999 | 0.585447  | -2.037388  | -2.020112 | 0.558688  | -2.036591          | -2.029411 | 0.538522  |
| H       | -2.157128 | -0.829334 | 1.883364  | -2.266454  | -0.889478 | 1.87327   | -2.247207          | -0.902519 | 1.85987   |
| C       | -4.063409 | -1.660932 | 1.119183  | -4.146753  | -1.645703 | 0.997196  | -4.139369          | -1.650853 | 1.005811  |
| H       | -4.258237 | -2.188381 | 2.064794  | -4.400551  | -2.186852 | 1.91027   | -4.382652          | -2.193771 | 1.920555  |
| C       | -4.867746 | -0.339893 | 0.919492  | -4.90817   | -0.304727 | 0.788907  | -4.899502          | -0.30723  | 0.812043  |
| C       | -4.216468 | -0.048862 | -0.482668 | -4.175602  | 0.004048  | -0.563853 | -4.183909          | 0.004403  | -0.549747 |
| C       | -4.482373 | -1.37319  | -1.248066 | -4.430254  | -1.291644 | -1.377597 | -4.454477          | -1.288134 | -1.363412 |
| H       | -3.730647 | -1.515453 | -2.03489  | -3.648544  | -1.433819 | -2.12107  | -3.684313          | -1.432535 | -2.118634 |
| H       | -5.466012 | -1.339581 | -1.739318 | -5.378324  | -1.223923 | -1.913111 | -5.410121          | -1.215594 | -1.884529 |

|   |           |           |           |           |           |           |           |           |           |
|---|-----------|-----------|-----------|-----------|-----------|-----------|-----------|-----------|-----------|
| C | -4.421919 | -2.470908 | -0.145036 | -4.454166 | -2.416934 | -0.302405 | -4.466391 | -2.417243 | -0.291776 |
| H | -5.38423  | -2.991486 | -0.0333   | -5.4251   | -2.911975 | -0.255936 | -5.438436 | -2.908883 | -0.234303 |
| H | -3.66411  | -3.240136 | -0.355713 | -3.709928 | -3.192302 | -0.491914 | -3.72634  | -3.19353  | -0.493835 |
| C | -4.587965 | 0.723798  | 1.993027  | -4.66881  | 0.723857  | 1.905677  | -4.642739 | 0.716875  | 1.929192  |
| H | -5.032238 | 0.414876  | 2.952087  | -5.168159 | 0.398836  | 2.821994  | -5.130237 | 0.387911  | 2.850468  |
| H | -5.04883  | 1.684817  | 1.715677  | -5.092488 | 1.693078  | 1.630912  | -5.068563 | 1.687616  | 1.66351   |
| H | -3.520678 | 0.905578  | 2.172314  | -3.619739 | 0.880422  | 2.149474  | -3.590172 | 0.871198  | 2.158919  |
| C | -6.388944 | -0.534963 | 0.860979  | -6.428577 | -0.459384 | 0.648618  | -6.422197 | -0.457252 | 0.691255  |
| H | -6.759236 | -0.915092 | 1.826165  | -6.850783 | -0.859008 | 1.574535  | -6.832012 | -0.85787  | 1.62228   |
| H | -6.711451 | -1.236108 | 0.081337  | -6.729657 | -1.119457 | -0.162157 | -6.736181 | -1.114587 | -0.116946 |
| H | -6.893384 | 0.425325  | 0.671983  | -6.894844 | 0.512493  | 0.469409  | -6.887238 | 0.516742  | 0.520603  |
| C | -4.67147  | 1.193953  | -1.225559 | -4.561006 | 1.272773  | -1.298316 | -4.579068 | 1.277571  | -1.271849 |
| H | -4.094132 | 1.317305  | -2.153878 | -3.947671 | 1.392175  | -2.193575 | -3.977587 | 1.406735  | -2.173948 |
| H | -4.533109 | 2.103944  | -0.62174  | -4.419794 | 2.158875  | -0.676207 | -4.431487 | 2.158891  | -0.644721 |
| H | -5.73589  | 1.125273  | -1.497325 | -5.607541 | 1.241275  | -1.609908 | -5.629505 | 1.246023  | -1.570042 |
| N | 2.34276   | 0.781363  | 1.296344  | 2.405511  | 0.778984  | 1.305044  | 2.395973  | 0.767292  | 1.30089   |
| H | 3.394634  | 1.172431  | 0.358483  | 3.386211  | 1.165573  | 0.290865  | 3.385078  | 1.162822  | 0.296888  |
| C | 2.911517  | 1.259942  | -0.629001 | 2.840307  | 1.239614  | -0.651666 | 2.851064  | 1.23579   | -0.652345 |
| H | 3.990516  | 2.53609   | 0.753817  | 3.998266  | 2.536057  | 0.624476  | 3.985066  | 2.535691  | 0.641721  |
| C | 3.211125  | 3.308154  | 0.813196  | 3.228363  | 3.300289  | 0.724089  | 3.209466  | 3.295029  | 0.732702  |
| H | 4.751983  | 2.857204  | 0.028895  | 4.701026  | 2.844128  | -0.151579 | 4.693898  | 2.84937   | -0.1264   |
| H | 4.481697  | 2.460343  | 1.736857  | 4.551161  | 2.477881  | 1.565847  | 4.52445   | 2.478747  | 1.590715  |
| H | 4.523615  | 0.153527  | 0.235448  | 4.508786  | 0.156633  | 0.098304  | 4.514967  | 0.159274  | 0.117099  |
| C | 4.895459  | -0.670317 | 1.305001  | 5.102656  | -0.487053 | 1.183387  | 5.086664  | -0.497781 | 1.20671   |
| C | 4.32687   | -0.633964 | 2.236639  | 4.727841  | -0.311321 | 2.184583  | 4.692022  | -0.334908 | 2.202206  |
| H | 5.957791  | -1.569764 | 1.177292  | 6.149383  | -1.38247  | 0.993143  | 6.139775  | -1.389079 | 1.026788  |
| C | 6.227657  | -2.212375 | 2.018087  | 6.592114  | -1.882336 | 1.846363  | 6.56516   | -1.899199 | 1.882801  |
| H | 6.665322  | -1.656385 | -0.02465  | 6.622581  | -1.643367 | -0.289749 | 6.641506  | -1.632038 | -0.249497 |
| C | 7.489448  | -2.364841 | -0.127989 | 7.43312   | -2.34589  | -0.439752 | 7.456642  | -2.331021 | -0.3914   |
| H | 6.304581  | -0.834657 | -1.097227 | 6.043545  | -0.998215 | -1.377856 | 6.08484   | -0.972274 | -1.341606 |
| C | 6.844634  | -0.901669 | -2.044028 | 6.400062  | -1.19876  | -2.38106  | 6.464008  | -1.157741 | -2.33944  |
| H | 5.244459  | 0.064049  | -0.963843 | 4.996576  | -0.103785 | -1.181098 | 5.031506  | -0.082137 | -1.155444 |
| C | 4.954989  | 0.691804  | -1.811589 | 4.538003  | 0.38276   | -2.035316 | 4.591937  | 0.416395  | -2.012609 |
| H | 2.545617  | 0.96774   | 2.27699   | 2.678348  | 0.968064  | 2.258706  | 2.656813  | 0.964384  | 2.256862  |

*trans*-N<sub>endo</sub>-O<sub>exo</sub>-4-S

| Element | PBE/TZVP  |           |           | B3LYP/TZVP |           |           | B3LYP/TZVP (CHCl3) |           |           |
|---------|-----------|-----------|-----------|------------|-----------|-----------|--------------------|-----------|-----------|
|         | x         | y         | z         | x          | y         | z         | x                  | y         | z         |
| P       | 1.457434  | 0.939241  | 1.488381  | -1.455601  | 0.935621  | -1.48193  | -1.453734          | 0.931358  | -1.479765 |
| P       | -0.225168 | 0.305837  | -0.504878 | 0.200976   | 0.317384  | 0.512354  | 0.21362            | 0.316686  | 0.504781  |
| O       | -1.730145 | 0.154372  | 0.342065  | 1.698534   | 0.154318  | -0.291584 | 1.708369           | 0.147655  | -0.303644 |
| N       | 0.541236  | 1.716112  | 0.189418  | -0.532937  | 1.718459  | -0.205265 | -0.516714          | 1.71627   | -0.213792 |
| N       | 0.89516   | -0.484954 | 0.578021  | -0.890897  | -0.476546 | -0.579013 | -0.883849          | -0.479671 | -0.577595 |
| C       | 0.349318  | 3.140785  | -0.13896  | -0.360412  | 3.141996  | 0.133898  | -0.349885          | 3.139901  | 0.134139  |
| C       | -1.146719 | 3.495782  | -0.11707  | 1.131005   | 3.506707  | 0.128213  | 1.141123           | 3.506211  | 0.141169  |
| H       | -1.695729 | 2.933145  | -0.885677 | 1.673993   | 2.947605  | 0.89114   | 1.681241           | 2.937311  | 0.899116  |
| H       | -1.292912 | 4.56832   | -0.316821 | 1.267423   | 4.570932  | 0.334555  | 1.273129           | 4.567515  | 0.363768  |
| H       | -1.585035 | 3.252597  | 0.860185  | 1.574105   | 3.275021  | -0.840133 | 1.590214           | 3.291153  | -0.828368 |
| C       | 1.079452  | 4.004988  | 0.901596  | -1.084647  | 4.009551  | -0.905501 | -1.067947          | 4.010095  | -0.907124 |
| H       | 2.156548  | 3.789371  | 0.91867   | -2.15221   | 3.791841  | -0.93273  | -2.135717          | 3.793828  | -0.939989 |
| H       | 0.676717  | 3.8302    | 1.910329  | -0.674853  | 3.847434  | -1.904421 | -0.651828          | 3.850912  | -1.904017 |
| H       | 0.941942  | 5.068199  | 0.65692   | -0.955702  | 5.063618  | -0.652869 | -0.939869          | 5.063144  | -0.65053  |
| C       | 0.916482  | 3.427263  | -1.54408  | -0.944042  | 3.420574  | 1.531215  | -0.943552          | 3.412034  | 1.528246  |
| H       | 1.999877  | 3.247009  | -1.573196 | -2.017025  | 3.230862  | 1.54869   | -2.015182          | 3.215525  | 1.539718  |
| H       | 0.732864  | 4.473149  | -1.834578 | -0.776315  | 4.461204  | 1.8196    | -0.783439          | 4.453407  | 1.817689  |
| H       | 0.439634  | 2.776148  | -2.291982 | -0.47219   | 2.781637  | 2.28051   | -0.471099          | 2.775647  | 2.2794    |
| C       | 0.88437   | -1.884096 | 1.053851  | -0.880025  | -1.879839 | -1.037835 | -0.885239          | -1.887875 | -1.021301 |
| C       | 2.238164  | -2.187405 | 1.718516  | -2.230928  | -2.200936 | -1.695257 | -2.236863          | -2.203982 | -1.679254 |
| H       | 3.068776  | -2.039629 | 1.017793  | -3.05354   | -2.055149 | -0.999254 | -3.059206          | -2.039321 | -0.986966 |
| H       | 2.251916  | -3.230575 | 2.067093  | -2.237098  | -3.240487 | -2.029252 | -2.251599          | -3.247925 | -1.998868 |
| H       | 2.402016  | -1.541693 | 2.595314  | -2.403224  | -1.572654 | -2.572308 | -2.40099           | -1.58519  | -2.564559 |
| C       | 0.711257  | -2.799584 | -0.168625 | -0.700784  | -2.786879 | 0.187836  | -0.717357          | -2.783754 | 0.21425   |
| H       | 1.55698   | -2.677351 | -0.859295 | -1.530269  | -2.652437 | 0.882     | -1.544784          | -2.630218 | 0.907298  |
| H       | -0.216014 | -2.569606 | -0.714067 | 0.227898   | -2.568603 | 0.716969  | 0.21482            | -2.571783 | 0.74015   |
| H       | 0.663756  | -3.851884 | 0.14806   | -0.670151  | -3.833819 | -0.120756 | -0.700308          | -3.834117 | -0.083304 |
| C       | -0.240544 | -2.131243 | 2.077793  | 0.244664   | -2.128329 | -2.058122 | 0.240279           | -2.158657 | -2.034953 |
| H       | -1.22334  | -1.936738 | 1.633961  | 1.216256   | -1.915385 | -1.621625 | 1.212557           | -1.952486 | -1.596056 |
| H       | -0.12346  | -1.458845 | 2.940898  | 0.119089   | -1.476806 | -2.925507 | 0.12436            | -1.514672 | -2.909565 |
| H       | -0.212445 | -3.169972 | 2.441961  | 0.230183   | -3.165486 | -2.402817 | 0.215332           | -3.199083 | -2.368734 |
| C       | -2.924867 | 0.133652  | -0.464011 | 2.896766   | 0.11932   | 0.495694  | 2.910807           | 0.126757  | 0.481344  |
| H       | -2.615948 | 0.148333  | -1.52543  | 2.604984   | 0.098151  | 1.550123  | 2.621318           | 0.131585  | 1.536215  |
| C       | -3.888029 | 1.317665  | -0.145988 | 3.845599   | 1.319157  | 0.207002  | 3.861315           | 1.317132  | 0.163161  |
| H       | -3.516038 | 1.882837  | 0.718756  | 3.463734   | 1.904403  | -0.627129 | 3.479451           | 1.886553  | -0.682169 |
| H       | -3.962898 | 2.018801  | -0.989936 | 3.924425   | 1.985809  | 1.066675  | 3.943814           | 2.001109  | 1.00841   |
| C       | -5.231447 | 0.62253   | 0.161776  | 5.189535   | 0.643856  | -0.13626  | 5.202195           | 0.629739  | -0.168025 |
| H       | -6.110876 | 1.272567  | 0.042628  | 6.058532   | 1.290428  | -0.003441 | 6.073486           | 1.276409  | -0.052803 |
| C       | -5.19389  | -0.619561 | -0.779169 | 5.169368   | -0.628431 | 0.75797   | 5.180988           | -0.620615 | 0.756895  |
| C       | -3.812165 | -1.119491 | -0.212833 | 3.78762    | -1.113966 | 0.190264  | 3.796617           | -1.116367 | 0.204184  |
| C       | -4.087945 | -1.17139  | 1.314287  | 4.045946   | -1.111607 | -1.339603 | 4.053659           | -1.153904 | -1.325152 |
| H       | -3.156129 | -1.040036 | 1.878272  | 3.117367   | -0.965348 | -1.885906 | 3.124587           | -1.024221 | -1.875081 |
| H       | -4.504669 | -2.149393 | 1.597344  | 4.462949   | -2.068013 | -1.658734 | 4.47185            | -2.118044 | -1.618198 |

|   |           |           |           |           |           |           |           |           |           |
|---|-----------|-----------|-----------|-----------|-----------|-----------|-----------|-----------|-----------|
| C | -5.096482 | -0.010837 | 1.562091  | 5.045731  | 0.061492  | -1.55599  | 5.053183  | 0.013454  | -1.57304  |
| H | -6.063085 | -0.381312 | 1.933261  | 6.002878  | -0.287845 | -1.945368 | 6.00855   | -0.347039 | -1.956548 |
| H | -4.72558  | 0.717459  | 2.297856  | 4.666761  | 0.806332  | -2.257364 | 4.672562  | 0.742026  | -2.290659 |
| C | -5.19149  | -0.265938 | -2.274878 | 5.186199  | -0.329512 | 2.265514  | 5.201825  | -0.285292 | 2.256804  |
| H | -6.179846 | 0.120057  | -2.569614 | 6.169774  | 0.048147  | 2.556463  | 6.187094  | 0.097598  | 2.534891  |
| H | -4.996778 | -1.161818 | -2.884787 | 5.005387  | -1.241872 | 2.839132  | 5.020837  | -1.183701 | 2.851974  |
| H | -4.449224 | 0.492537  | -2.553283 | 4.451475  | 0.408041  | 2.582456  | 4.469223  | 0.461079  | 2.557635  |
| C | -6.344421 | -1.610291 | -0.553032 | 6.325875  | -1.601517 | 0.489619  | 6.334598  | -1.602965 | 0.509876  |
| H | -7.308188 | -1.127633 | -0.779761 | 7.280252  | -1.116155 | 0.710687  | 7.289673  | -1.115064 | 0.722131  |
| H | -6.397728 | -1.994611 | 0.473047  | 6.368874  | -1.960534 | -0.536489 | 6.377732  | -1.983608 | -0.508476 |
| H | -6.246538 | -2.475897 | -1.226314 | 6.247026  | -2.476532 | 1.139182  | 6.251462  | -2.463617 | 1.17786   |
| C | -3.257037 | -2.407083 | -0.793182 | 3.246507  | -2.423596 | 0.728423  | 3.25155   | -2.410197 | 0.775868  |
| H | -2.32106  | -2.6916   | -0.292295 | 2.31698   | -2.694656 | 0.228432  | 2.31754   | -2.687355 | 0.287041  |
| H | -3.043072 | -2.308354 | -1.869036 | 3.043412  | -2.363721 | 1.800743  | 3.054558  | -2.32339  | 1.847395  |
| H | -3.964396 | -3.239711 | -0.658302 | 3.955535  | -3.237663 | 0.561041  | 3.955675  | -3.231487 | 0.624002  |
| N | 3.090181  | 1.176355  | 1.008722  | -3.075794 | 1.180563  | -0.997962 | -3.070619 | 1.170572  | -1.002047 |
| H | 3.669606  | 1.060314  | -0.332733 | -3.649353 | 1.058755  | 0.342882  | -3.648914 | 1.060417  | 0.338461  |
| C | 2.819641  | 1.15101   | -1.027292 | -2.812779 | 1.161895  | 1.034457  | -2.814479 | 1.153384  | 1.034022  |
| H | 4.644318  | 2.216574  | -0.597087 | -4.636223 | 2.202504  | 0.604244  | -4.623462 | 2.216057  | 0.593531  |
| C | 4.139016  | 3.184632  | -0.470401 | -4.144528 | 3.167709  | 0.476152  | -4.121345 | 3.175322  | 0.461706  |
| H | 5.05027   | 2.157425  | -1.617313 | -5.038671 | 2.141149  | 1.617085  | -5.024458 | 2.163962  | 1.60744   |
| H | 5.494684  | 2.180148  | 0.101778  | -5.478079 | 2.155338  | -0.091148 | -5.465124 | 2.174041  | -0.102094 |
| H | 4.326985  | -0.288153 | -0.595407 | -4.287536 | -0.296716 | 0.599825  | -4.30558  | -0.286927 | 0.59327   |
| C | 5.390406  | -0.745175 | 0.197123  | -5.344994 | -0.755363 | -0.187935 | -5.354909 | -0.739271 | -0.209908 |
| C | 5.755626  | -0.131274 | 1.025096  | -5.721685 | -0.139557 | -0.997006 | -5.710586 | -0.125536 | -1.029728 |
| H | 5.97871   | -1.988522 | -0.042509 | -5.910226 | -2.005057 | 0.035071  | -5.937136 | -1.981947 | 0.012404  |
| C | 6.799515  | -2.332821 | 0.590236  | -6.723768 | -2.349282 | -0.592149 | -6.743759 | -2.321716 | -0.626127 |
| H | 5.515694  | -2.79428  | -1.088484 | -5.428917 | -2.816528 | 1.059965  | -5.481308 | -2.792334 | 1.050832  |
| C | 5.972177  | -3.7684   | -1.274289 | -5.865259 | -3.792669 | 1.232409  | -5.930548 | -3.762913 | 1.221933  |
| H | 4.464047  | -2.34472  | -1.891036 | -4.383226 | -2.365129 | 1.857556  | -4.444079 | -2.346441 | 1.863497  |
| C | 4.092506  | -2.96837  | -2.707029 | -3.998269 | -2.990875 | 2.653833  | -4.078913 | -2.970764 | 2.670154  |
| H | 3.876432  | -1.100516 | -1.643337 | -3.818868 | -1.11375  | 1.626169  | -3.863278 | -1.101617 | 1.633597  |
| C | 3.038472  | -0.760573 | -2.25754  | -2.98715  | -0.777317 | 2.234379  | -3.040761 | -0.768915 | 2.256225  |
| H | 3.747964  | 1.272821  | 1.778923  | -3.735833 | 1.257805  | -1.757459 | -3.725829 | 1.280665  | -1.762034 |

*trans*-N<sub>exo</sub>-O<sub>endo</sub>-4-S

| Element | PBE/TZVP  |           |           | B3LYP/TZVP |           |           | B3LYP/TZVP (CHCl3) |          |          |
|---------|-----------|-----------|-----------|------------|-----------|-----------|--------------------|----------|----------|
|         | X         | y         | z         | x          | y         | z         | x                  | y        | z        |
| P       | 0.906311  | 0.625246  | -0.526357 | 0.906452   | 0.623193  | -0.549406 | -1.45373           | 0.931358 | -1.47977 |
| P       | -0.597921 | 0.714255  | 1.714887  | -0.570809  | 0.665915  | 1.68585   | 0.21362            | 0.316686 | 0.504781 |
| O       | -2.187866 | 0.245109  | 1.338885  | -2.140593  | 0.196849  | 1.325324  | 1.708369           | 0.147655 | -0.30364 |
| N       | 0.42776   | -0.405137 | 0.837285  | 0.436115   | -0.432512 | 0.781676  | -0.51671           | 1.71627  | -0.21379 |
| N       | -0.084089 | 1.75606   | 0.397917  | -0.089501  | 1.725157  | 0.385407  | -0.88385           | -0.47967 | -0.5776  |
| C       | 0.894647  | -1.751766 | 1.209628  | 0.912653   | -1.781035 | 1.130103  | -0.34989           | 3.139901 | 0.134139 |
| C       | -0.117801 | -2.386277 | 2.17567   | -0.105286  | -2.456341 | 2.059964  | 1.141123           | 3.506211 | 0.141169 |
| H       | -0.23011  | -1.779938 | 3.087543  | -0.232825  | -1.890886 | 2.985643  | 1.681241           | 2.937311 | 0.899116 |
| H       | 0.230225  | -3.385077 | 2.477116  | 0.244295   | -3.455584 | 2.326731  | 1.273129           | 4.567515 | 0.363768 |
| H       | -1.105696 | -2.488248 | 1.708816  | -1.078865  | -2.548584 | 1.581778  | 1.590214           | 3.291153 | -0.82837 |
| C       | 1.00352   | -2.611887 | -0.061268 | 1.053613   | -2.610936 | -0.154969 | -1.06795           | 4.010095 | -0.90712 |
| H       | 1.723346  | -2.178061 | -0.771307 | 1.785643   | -2.168593 | -0.832665 | -2.13572           | 3.793828 | -0.93999 |
| H       | 0.027551  | -2.694036 | -0.562166 | 0.097552   | -2.681169 | -0.676999 | -0.65183           | 3.850912 | -1.90402 |
| H       | 1.355156  | -3.623065 | 0.191708  | 1.395203   | -3.620086 | 0.084156  | -0.93987           | 5.063144 | -0.65053 |
| C       | 2.271061  | -1.673571 | 1.902825  | 2.273386   | -1.700351 | 1.846432  | -0.94355           | 3.412034 | 1.528246 |
| H       | 3.028995  | -1.253086 | 1.22938   | 3.027957   | -1.254258 | 1.201296  | -2.01518           | 3.215525 | 1.539718 |
| H       | 2.611764  | -2.673662 | 2.212641  | 2.622435   | -2.695055 | 2.134717  | -0.78344           | 4.453407 | 1.817689 |
| H       | 2.207243  | -1.037654 | 2.798593  | 2.185902   | -1.092362 | 2.74968   | -0.4711            | 2.775647 | 2.2794   |
| C       | -0.192291 | 3.220053  | 0.285277  | -0.205259  | 3.189743  | 0.297767  | -0.88524           | -1.88788 | -1.0213  |
| C       | 0.995235  | 3.914429  | 0.989472  | 0.977322   | 3.875779  | 1.011752  | -2.23686           | -2.20398 | -1.67925 |
| H       | 1.035133  | 3.616032  | 2.047927  | 1.019886   | 3.561     | 2.056856  | -3.05921           | -2.03932 | -0.98697 |
| H       | 0.892485  | 5.009939  | 0.944655  | 0.869049   | 4.963248  | 0.987035  | -2.2516            | -3.24793 | -1.99887 |
| H       | 1.943665  | 3.635099  | 0.511272  | 1.919242   | 3.612439  | 0.53192   | -2.40099           | -1.58519 | -2.56456 |
| C       | -1.499445 | 3.683442  | 0.952122  | -1.513546  | 3.639224  | 0.968301  | -0.71736           | -2.78375 | 0.21425  |
| H       | -1.518799 | 3.407945  | 2.017571  | -1.528876  | 3.36713   | 2.025787  | -1.54478           | -2.63022 | 0.907298 |
| H       | -2.378826 | 3.234356  | 0.471574  | -2.382751  | 3.18657   | 0.492768  | 0.21482            | -2.57178 | 0.74015  |
| H       | -1.585092 | 4.777996  | 0.885684  | -1.609058  | 4.724857  | 0.902507  | -0.70031           | -3.83412 | -0.0833  |
| C       | -0.204208 | 3.60534   | -1.203823 | -0.220903  | 3.602954  | -1.181666 | 0.240279           | -2.15866 | -2.03495 |
| H       | -1.051588 | 3.135667  | -1.7225   | -1.052394  | 3.132086  | -1.707254 | 1.212557           | -1.95249 | -1.59606 |
| H       | 0.723853  | 3.284257  | -1.701109 | 0.706331   | 3.313539  | -1.680837 | 0.12436            | -1.51467 | -2.90957 |
| H       | -0.285163 | 4.696942  | -1.313341 | -0.321957  | 4.686784  | -1.26832  | 0.215332           | -3.19908 | -2.36873 |
| C       | -2.572918 | -0.385136 | 0.100105  | -2.560829  | -0.416921 | 0.097883  | 2.910807           | 0.126757 | 0.481344 |
| H       | -1.787052 | -1.114214 | -0.151936 | -1.811036  | -1.162654 | -0.165401 | 2.621318           | 0.131585 | 1.536215 |
| C       | -2.823053 | 0.579963  | -1.098169 | -2.796042  | 0.557518  | -1.092582 | 3.861315           | 1.317132 | 0.163161 |
| H       | -2.736074 | 1.624427  | -0.776717 | -2.663358  | 1.587621  | -0.776287 | 3.479451           | 1.886553 | -0.68217 |
| H       | -2.081347 | 0.426181  | -1.894683 | -2.083619  | 0.37642   | -1.897385 | 3.943814           | 2.001109 | 1.00841  |
| C       | -4.261758 | 0.236517  | -1.538934 | -4.252728  | 0.264712  | -1.505879 | 5.202195           | 0.629739 | -0.16803 |
| H       | -4.496519 | 0.525784  | -2.574079 | -4.49445   | 0.563575  | -2.52729  | 6.073486           | 1.276409 | -0.0528  |
| C       | -4.35309  | -1.291481 | -1.241427 | -4.391011  | -1.257206 | -1.211947 | 5.180988           | -0.62062 | 0.756895 |
| C       | -3.933682 | -1.114907 | 0.265307  | -3.938643  | -1.100014 | 0.282808  | 3.796617           | -1.11637 | 0.204184 |
| C       | -4.950287 | -0.053962 | 0.765437  | -4.911154  | -0.012016 | 0.806275  | 4.053659           | -1.1539  | -1.32515 |
| H       | -4.533563 | 0.501946  | 1.61492   | -4.469768  | 0.52156   | 1.645515  | 3.124587           | -1.02422 | -1.87508 |
| H       | -5.871939 | -0.542038 | 1.115335  | -5.836434  | -0.467912 | 1.161629  | 4.47185            | -2.11804 | -1.6182  |

|   |           |           |           |           |           |           |          |          |          |
|---|-----------|-----------|-----------|-----------|-----------|-----------|----------|----------|----------|
| C | -5.206608 | 0.845233  | -0.480318 | -5.155744 | 0.902336  | -0.429738 | 5.053183 | 0.013454 | -1.57304 |
| H | -6.256941 | 0.805044  | -0.803872 | -6.203752 | 0.901468  | -0.732597 | 6.00855  | -0.34704 | -1.95655 |
| H | -4.968486 | 1.902722  | -0.292784 | -4.878783 | 1.941015  | -0.241633 | 4.672562 | 0.742026 | -2.29066 |
| C | -3.390477 | -2.144841 | -2.082695 | -3.477759 | -2.141468 | -2.076115 | 5.201825 | -0.28529 | 2.256804 |
| H | -3.731348 | -2.172568 | -3.12944  | -3.831556 | -2.140008 | -3.110287 | 6.187094 | 0.097598 | 2.534891 |
| H | -3.374236 | -3.18401  | -1.718361 | -3.503184 | -3.176178 | -1.725353 | 5.020837 | -1.1837  | 2.851974 |
| H | -2.356498 | -1.777389 | -2.086842 | -2.436515 | -1.825396 | -2.091707 | 4.469223 | 0.461079 | 2.557635 |
| C | -5.75786  | -1.882671 | -1.421381 | -5.816346 | -1.802639 | -1.373715 | 6.334598 | -1.60297 | 0.509876 |
| H | -6.067509 | -1.807967 | -2.475743 | -6.134408 | -1.713823 | -2.415929 | 7.289673 | -1.11506 | 0.722131 |
| H | -6.523744 | -1.385453 | -0.813453 | -6.554542 | -1.290917 | -0.759824 | 6.377732 | -1.98361 | -0.50848 |
| H | -5.763966 | -2.950681 | -1.153592 | -5.850343 | -2.862802 | -1.110959 | 6.251462 | -2.46362 | 1.17786  |
| C | -3.868532 | -2.36338  | 1.12539   | -3.893774 | -2.350424 | 1.138246  | 3.25155  | -2.4102  | 0.775868 |
| H | -3.526584 | -2.112788 | 2.140727  | -3.522901 | -2.112871 | 2.137345  | 2.31754  | -2.68736 | 0.287041 |
| H | -3.171217 | -3.107201 | 0.708165  | -3.234776 | -3.108024 | 0.70644   | 3.054558 | -2.32339 | 1.847395 |
| H | -4.857925 | -2.837976 | 1.212198  | -4.888089 | -2.790292 | 1.244273  | 3.955675 | -3.23149 | 0.624002 |
| N | 2.522122  | 1.148904  | -0.228407 | 2.506899  | 1.145519  | -0.229871 | -3.07062 | 1.170572 | -1.00205 |
| H | 3.589985  | 0.981964  | -1.219974 | 3.594066  | 1.005357  | -1.200511 | -3.64891 | 1.060417 | 0.338461 |
| C | 3.073366  | 0.73777   | -2.164209 | 3.110391  | 0.780582  | -2.154929 | -2.81448 | 1.153384 | 1.034022 |
| H | 4.362729  | 2.291735  | -1.420917 | 4.356944  | 2.324577  | -1.357007 | -4.62346 | 2.216057 | 0.593531 |
| C | 3.676452  | 3.086586  | -1.745184 | 3.675402  | 3.110127  | -1.686219 | -4.12135 | 3.175322 | 0.461706 |
| H | 5.1514    | 2.169212  | -2.177607 | 5.162911  | 2.223811  | -2.086602 | -5.02446 | 2.163962 | 1.60744  |
| H | 4.841853  | 2.620927  | -0.486239 | 4.799098  | 2.64102   | -0.409679 | -5.46512 | 2.174041 | -0.10209 |
| H | 4.495856  | -0.197018 | -0.881733 | 4.500103  | -0.169761 | -0.86076  | -4.30558 | -0.28693 | 0.59327  |
| C | 5.393826  | -0.140094 | 0.19558   | 5.369851  | -0.120302 | 0.231171  | -5.35491 | -0.73927 | -0.20991 |
| C | 5.490088  | 0.780383  | 0.777403  | 5.445768  | 0.78528   | 0.821902  | -5.71059 | -0.12554 | -1.02973 |
| H | 6.1629    | -1.251784 | 0.545752  | 6.134006  | -1.226295 | 0.584464  | -5.93714 | -1.98195 | 0.012404 |
| C | 6.851812  | -1.190814 | 1.390864  | 6.798145  | -1.171453 | 1.438604  | -6.74376 | -2.32172 | -0.62613 |
| H | 6.05121   | -2.441195 | -0.181739 | 6.044724  | -2.403331 | -0.154187 | -5.48131 | -2.79233 | 1.050832 |
| C | 6.650998  | -3.311045 | 0.092787  | 6.638169  | -3.266221 | 0.121814  | -5.93055 | -3.76291 | 1.221933 |
| H | 5.16937   | -2.506907 | -1.263326 | 5.189725  | -2.461615 | -1.249124 | -4.44408 | -2.34644 | 1.863497 |
| C | 5.076971  | -3.429787 | -1.839802 | 5.113461  | -3.371971 | -1.831429 | -4.07891 | -2.97076 | 2.670154 |
| H | 4.400221  | -1.391705 | -1.608031 | 4.425329  | -1.351499 | -1.596877 | -3.86328 | -1.10162 | 1.633597 |
| C | 3.705008  | -1.450123 | -2.450146 | 3.75286   | -1.407829 | -2.445707 | -3.04076 | -0.76892 | 2.256225 |
| H | 2.828089  | 1.334921  | 0.728679  | 2.79385   | 1.315965  | 0.726626  | -3.72583 | 1.280665 | -1.76203 |

## 4-R

cis-N<sub>endo</sub>-O<sub>exo</sub>-4-R

| Element | PBE/TZVP  |           |           | PBE/TZVP (CHCl3) |           |           | B3LYP/TZVP (CHCl3) |           |           |
|---------|-----------|-----------|-----------|------------------|-----------|-----------|--------------------|-----------|-----------|
|         | X         | y         | z         | x                | y         | z         | x                  | y         | z         |
| O       | 0.916228  | 0.259785  | 0.121538  | 0.921690         | 0.252185  | 0.127717  | 0.878587           | 0.293955  | 0.153265  |
| P       | -2.588165 | 1.404922  | 0.382021  | -2.573320        | 1.423926  | 0.377321  | -2.599884          | 1.373914  | 0.369730  |
| P       | 0.001485  | 1.398874  | 1.018867  | 0.013755         | 1.397091  | 1.019614  | -0.042353          | 1.378939  | 1.068416  |
| N       | -1.418527 | 0.444727  | 1.328302  | -1.414493        | 0.455707  | 1.328302  | -1.457916          | 0.427763  | 1.338765  |
| N       | -1.068839 | 2.123288  | -0.178103 | -1.047818        | 2.132067  | -0.178217 | -1.090324          | 2.144090  | -0.097704 |
| N       | -3.056223 | 0.439418  | -0.951705 | -3.051625        | 0.461858  | -0.952404 | -3.001344          | 0.438811  | -0.991549 |
| H       | -4.058324 | 0.284612  | -1.043977 | -4.055697        | 0.321384  | -1.050327 | -3.988614          | 0.272206  | -1.126059 |
| C       | -1.725470 | -0.300786 | 2.567907  | -1.728509        | -0.289600 | 2.566372  | -1.773109          | -0.387779 | 2.528626  |
| C       | -1.965407 | 0.660290  | 3.748804  | -1.975694        | 0.670380  | 3.746705  | -2.094413          | 0.504728  | 3.740908  |
| H       | -1.070680 | 1.273963  | 3.933350  | -1.082209        | 1.284352  | 3.936494  | -1.242038          | 1.143320  | 3.982993  |
| H       | -2.198917 | 0.105238  | 4.670579  | -2.213451        | 0.113419  | 4.666153  | -2.329425          | -0.100444 | 4.620051  |
| H       | -2.806798 | 1.334752  | 3.529636  | -2.816726        | 1.344255  | 3.523960  | -2.952304          | 1.145763  | 3.527024  |
| C       | -0.545214 | -1.232130 | 2.881388  | -0.549825        | -1.220402 | 2.887693  | -0.567259          | -1.281855 | 2.846148  |
| H       | 0.371472  | -0.655644 | 3.076869  | 0.363996         | -0.643002 | 3.093952  | 0.306863           | -0.685436 | 3.114228  |
| H       | -0.355037 | -1.909298 | 2.038031  | -0.349933        | -1.893477 | 2.043115  | -0.313153          | -1.897732 | 1.984464  |
| H       | -0.762825 | -1.831042 | 3.778079  | -0.775581        | -1.822446 | 3.780180  | -0.796823          | -1.933139 | 3.691924  |
| C       | -2.985610 | -1.145771 | 2.319289  | -2.986918        | -1.135211 | 2.311173  | -2.982024          | -1.277898 | 2.205683  |
| H       | -3.851148 | -0.505641 | 2.087447  | -3.851333        | -0.496330 | 2.071780  | -3.864553          | -0.677726 | 1.971959  |
| H       | -3.230785 | -1.725245 | 3.221408  | -3.237005        | -1.713556 | 3.212612  | -3.224014          | -1.900268 | 3.069522  |
| H       | -2.833310 | -1.840135 | 1.482546  | -2.827145        | -1.829145 | 1.475287  | -2.770120          | -1.923822 | 1.355168  |
| C       | -0.918791 | 3.481574  | -0.741032 | -0.884523        | 3.491692  | -0.737425 | -0.918896          | 3.483300  | -0.691727 |
| C       | 0.517311  | 3.619291  | -1.272255 | 0.549972         | 3.613921  | -1.276361 | 0.532353           | 3.614635  | -1.177337 |
| H       | 1.250073  | 3.530070  | -0.454802 | 1.287141         | 3.512064  | -0.464341 | 1.234805           | 3.569377  | -0.341990 |
| H       | 0.658303  | 4.604367  | -1.740836 | 0.699431         | 4.599473  | -1.741033 | 0.676341           | 4.574264  | -1.677409 |
| H       | 0.730827  | 2.839111  | -2.016689 | 0.749637         | 2.834937  | -2.025963 | 0.776999           | 2.814467  | -1.877340 |
| C       | -1.189306 | 4.565613  | 0.321243  | -1.135657        | 4.575059  | 0.330187  | -1.226565          | 4.591669  | 0.331273  |
| H       | -0.485571 | 4.463309  | 1.160839  | -0.428077        | 4.462181  | 1.165281  | -0.561418          | 4.510465  | 1.193475  |
| H       | -2.211964 | 4.468280  | 0.715327  | -2.157420        | 4.489615  | 0.729693  | -2.256412          | 4.509333  | 0.684864  |
| H       | -1.077652 | 5.575565  | -0.102853 | -1.013718        | 5.584140  | -0.092721 | -1.094813          | 5.581720  | -0.112216 |
| C       | -1.907681 | 3.638987  | -1.907196 | -1.878278        | 3.667073  | -1.896732 | -1.860762          | 3.616056  | -1.896865 |
| H       | -1.717218 | 2.882457  | -2.681233 | -1.703123        | 2.912209  | -2.676028 | -1.648833          | 2.842835  | -2.635836 |
| H       | -1.805889 | 4.638142  | -2.356204 | -1.764380        | 4.666912  | -2.340914 | -1.731082          | 4.594025  | -2.364887 |
| H       | -2.946779 | 3.522938  | -1.565353 | -2.917065        | 3.565392  | -1.548793 | -2.906108          | 3.522231  | -1.597197 |
| C       | 2.308427  | 0.545316  | -0.114100 | 2.317681         | 0.529059  | -0.108129 | 2.264204           | 0.572146  | -0.093897 |
| H       | 2.517160  | 1.578437  | 0.215459  | 2.533866         | 1.558416  | 0.227459  | 2.477259           | 1.597405  | 0.218148  |
| C       | 2.661753  | 0.344563  | -1.616197 | 2.668330         | 0.336329  | -1.611695 | 2.603651           | 0.359899  | -1.594796 |
| H       | 1.777074  | -0.008184 | -2.164743 | 1.781767         | -0.007425 | -2.163013 | 1.723642           | 0.003255  | -2.129927 |
| H       | 2.987885  | 1.283809  | -2.085854 | 3.000457         | 1.277035  | -2.073794 | 2.922614           | 1.288506  | -2.069047 |
| C       | 3.784735  | -0.711317 | -1.573295 | 3.784434         | -0.727179 | -1.576522 | 3.729610           | -0.691452 | -1.550509 |
| H       | 4.396250  | -0.755232 | -2.486434 | 4.396123         | -0.767970 | -2.489605 | 4.331434           | -0.738217 | -2.459251 |
| C       | 4.557915  | -0.319928 | -0.276355 | 4.560134         | -0.350523 | -0.276788 | 4.507461           | -0.291726 | -0.262707 |



|   |           |           |           |           |           |           |           |           |           |
|---|-----------|-----------|-----------|-----------|-----------|-----------|-----------|-----------|-----------|
| C | 3.273729  | -0.426274 | 0.629100  | 3.275085  | -0.454837 | 0.627935  | 3.230625  | -0.393656 | 0.646652  |
| C | 2.781575  | -1.860442 | 0.319170  | 2.773901  | -1.883659 | 0.307590  | 2.740884  | -1.829971 | 0.351374  |
| H | 1.708689  | -1.952701 | 0.530134  | 1.700369  | -1.971857 | 0.517851  | 1.679749  | -1.927138 | 0.567518  |
| H | 3.300048  | -2.588487 | 0.960296  | 3.289197  | -2.619304 | 0.942491  | 3.263786  | -2.546472 | 0.986236  |
| C | 3.129181  | -2.058072 | -1.186578 | 3.119918  | -2.072423 | -1.199773 | 3.079933  | -2.036629 | -1.154126 |
| H | 3.818884  | -2.900953 | -1.337751 | 3.804015  | -2.918890 | -1.356273 | 3.766221  | -2.871468 | -1.300648 |
| H | 2.238957  | -2.259123 | -1.800933 | 2.227794  | -2.261852 | -1.815319 | 2.193785  | -2.242172 | -1.756747 |
| C | 5.670114  | -1.306405 | 0.105385  | 5.665661  | -1.347411 | 0.097650  | 5.627359  | -1.270082 | 0.117807  |
| H | 6.473957  | -1.276418 | -0.646891 | 6.469422  | -1.315302 | -0.654653 | 6.416187  | -1.242025 | -0.638536 |
| H | 5.328110  | -2.345678 | 0.183248  | 5.317029  | -2.385186 | 0.166712  | 5.297440  | -2.302714 | 0.209435  |
| H | 6.117593  | -1.029851 | 1.072621  | 6.113817  | -1.080993 | 1.067454  | 6.077679  | -0.982572 | 1.071001  |
| C | 5.193591  | 1.078721  | -0.322976 | 5.205080  | 1.044291  | -0.313168 | 5.145530  | 1.105494  | -0.323025 |
| H | 4.494280  | 1.879759  | -0.593511 | 4.511100  | 1.851933  | -0.577828 | 4.453500  | 1.902426  | -0.588139 |
| H | 6.012560  | 1.095606  | -1.058943 | 6.023873  | 1.059750  | -1.049383 | 5.949969  | 1.113600  | -1.062963 |
| H | 5.629055  | 1.336382  | 0.654819  | 5.641967  | 1.291144  | 0.666821  | 5.587130  | 1.363430  | 0.642501  |
| C | 3.436165  | -0.118415 | 2.106361  | 3.440967  | -0.159171 | 2.107473  | 3.398428  | -0.079073 | 2.120283  |
| H | 2.471937  | -0.196391 | 2.630355  | 2.477139  | -0.236579 | 2.632743  | 2.445162  | -0.164184 | 2.645358  |
| H | 3.815878  | 0.902417  | 2.267323  | 3.827440  | 0.858148  | 2.274703  | 3.769054  | 0.937570  | 2.271796  |
| H | 4.130979  | -0.824310 | 2.586628  | 4.133116  | -0.872543 | 2.580464  | 4.098785  | -0.771845 | 2.592490  |
| C | -2.188071 | -0.419621 | -1.766692 | -2.189706 | -0.406264 | -1.764879 | -2.093452 | -0.390303 | -1.790564 |
| H | -1.173240 | -0.012080 | -1.637112 | -1.169877 | -0.014624 | -1.627707 | -1.097863 | 0.025226  | -1.632984 |
| C | -2.573307 | -0.312888 | -3.247742 | -2.563153 | -0.291506 | -3.248338 | -2.439690 | -0.272730 | -3.278234 |
| H | -2.514155 | 0.732329  | -3.582679 | -2.480516 | 0.752611  | -3.581807 | -2.384001 | 0.768702  | -3.597870 |
| H | -3.601319 | -0.670232 | -3.417716 | -3.596569 | -0.628714 | -3.424910 | -3.451152 | -0.636743 | -3.475928 |
| H | -1.902309 | -0.925969 | -3.866753 | -1.897613 | -0.914845 | -3.863159 | -1.747734 | -0.864832 | -3.880341 |
| C | -2.166892 | -1.866288 | -1.290089 | -2.192037 | -1.853859 | -1.289986 | -2.065692 | -1.838636 | -1.327722 |
| C | -0.965905 | -2.437761 | -0.851535 | -1.001819 | -2.442177 | -0.842918 | -0.881744 | -2.389385 | -0.841639 |
| H | -0.068694 | -1.816182 | -0.828177 | -0.095798 | -1.833433 | -0.813521 | -0.004830 | -1.760514 | -0.776489 |
| C | -0.924496 | -3.760075 | -0.400511 | -0.981778 | -3.765256 | -0.390897 | -0.838637 | -3.706636 | -0.393450 |
| H | 0.021379  | -4.184937 | -0.055787 | -0.044926 | -4.203253 | -0.037928 | 0.089903  | -4.113297 | -0.009820 |
| C | -2.090296 | -4.530727 | -0.379486 | -2.158766 | -4.520195 | -0.378741 | -1.986702 | -4.492522 | -0.424065 |
| H | -2.063214 | -5.561968 | -0.021755 | -2.148615 | -5.551671 | -0.020566 | -1.959130 | -5.515793 | -0.069617 |
| C | -3.295637 | -3.969882 | -0.816360 | -3.353529 | -3.942175 | -0.824693 | -3.175991 | -3.951306 | -0.909933 |
| H | -4.211667 | -4.564535 | -0.801943 | -4.277918 | -4.523987 | -0.816924 | -4.075469 | -4.554992 | -0.935092 |
| C | -3.330280 | -2.649858 | -1.272081 | -3.367107 | -2.621081 | -1.280495 | -3.211767 | -2.636101 | -1.361546 |
| H | -4.281165 | -2.224859 | -1.606146 | -4.309667 | -2.182387 | -1.619664 | -4.146471 | -2.226780 | -1.728379 |

*trans*-N<sub>endo</sub>-O<sub>exo</sub>-4-R

| Element | PBE/TZVP  |           |           | PBE/TZVP (CHCl3) |           |           | B3LYP/TZVP (CHCl3) |           |           |
|---------|-----------|-----------|-----------|------------------|-----------|-----------|--------------------|-----------|-----------|
|         | x         | y         | z         | x                | y         | z         | x                  | y         | z         |
| O       | -1.682879 | 0.193483  | -0.430717 | 1.695130         | 0.189455  | 0.434836  | -1.648343          | 0.166832  | -0.423028 |
| P       | 1.481492  | 0.989058  | -1.434515 | -1.475430        | 0.974882  | 1.426737  | 1.495957           | 0.989263  | -1.435807 |
| P       | -0.192016 | 0.120384  | 0.461419  | 0.209019         | 0.125006  | -0.465491 | -0.171347          | 0.128852  | 0.442859  |
| N       | 1.012645  | -0.529730 | -0.627362 | -1.000862        | -0.537365 | 0.608762  | 1.007878           | -0.521417 | -0.651782 |
| N       | 0.537123  | 1.621298  | -0.066908 | -0.526594        | 1.618924  | 0.066860  | 0.529197           | 1.620221  | -0.099456 |
| N       | 3.088454  | 1.318138  | -0.939212 | -3.082831        | 1.302784  | 0.947980  | 3.084152           | 1.321112  | -0.928188 |
| H       | 3.747820  | 1.472580  | -1.698451 | -3.733092        | 1.466229  | 1.713745  | 3.752893           | 1.452044  | -1.673136 |
| C       | 1.079855  | -1.886779 | -1.204259 | -1.070562        | -1.902280 | 1.168024  | 1.085771           | -1.883688 | -1.211380 |
| C       | 0.084786  | -2.048168 | -2.371279 | -0.082304        | -2.080688 | 2.338318  | 0.087248           | -2.063228 | -2.369661 |
| H       | -0.946214 | -1.882534 | -2.035371 | 0.950665         | -1.909191 | 2.011039  | -0.932393          | -1.887405 | -2.032738 |
| H       | 0.154917  | -3.057478 | -2.805857 | -0.154404        | -3.097037 | 2.755491  | 0.150112           | -3.074295 | -2.779869 |
| H       | 0.301657  | -1.316101 | -3.163400 | -0.305825        | -1.362202 | 3.141206  | 0.301982           | -1.354625 | -3.172291 |
| C       | 0.759047  | -2.901188 | -0.095133 | -0.743122        | -2.902367 | 0.047782  | 0.775687           | -2.893359 | -0.096990 |
| H       | -0.262283 | -2.764622 | 0.294229  | 0.281631         | -2.763217 | -0.331584 | -0.245273          | -2.781762 | 0.275607  |
| H       | 1.465109  | -2.794944 | 0.740215  | -1.442967        | -2.784243 | -0.791593 | 1.464949           | -2.764475 | 0.738071  |
| H       | 0.831788  | -3.925109 | -0.489861 | -0.820536        | -3.930998 | 0.428958  | 0.876908           | -3.910834 | -0.479380 |
| C       | 2.506657  | -2.139216 | -1.719292 | -2.499913        | -2.161890 | 1.671696  | 2.510356           | -2.135184 | -1.726355 |
| H       | 2.780644  | -1.408447 | -2.495729 | -2.778301        | -1.443319 | 2.457882  | 2.779334           | -1.420593 | -2.507613 |
| H       | 2.570073  | -3.141818 | -2.167659 | -2.565687        | -3.172020 | 2.102374  | 2.576830           | -3.136693 | -2.156606 |
| H       | 3.239272  | -2.068499 | -0.906542 | -3.226540        | -2.075373 | 0.854903  | 3.236202           | -2.050436 | -0.921114 |
| C       | -0.015070 | 2.987686  | 0.048429  | 0.015777         | 2.989988  | -0.048371 | -0.001547          | 2.990111  | 0.042228  |
| C       | -0.815249 | 3.082556  | 1.356175  | 0.817569         | 3.090722  | -1.354628 | -0.790859          | 3.083402  | 1.355003  |
| H       | -1.699094 | 2.430194  | 1.330974  | 1.704195         | 2.441812  | -1.328890 | -1.675371          | 2.447074  | 1.333504  |
| H       | -1.165465 | 4.114207  | 1.504949  | 1.163654         | 4.124235  | -1.499483 | -1.125732          | 4.110338  | 1.510987  |
| H       | -0.192635 | 2.799705  | 2.217884  | 0.197669         | 2.807964  | -2.218306 | -0.169933          | 2.791593  | 2.204364  |
| C       | -0.924494 | 3.322366  | -1.151284 | 0.922655         | 3.331475  | 1.151206  | -0.919453          | 3.346455  | -1.141643 |
| H       | -1.731391 | 2.582845  | -1.234820 | 1.741076         | 2.603712  | 1.227981  | -1.723302          | 2.616577  | -1.226003 |
| H       | -0.347082 | 3.301316  | -2.087873 | 0.347458         | 3.299045  | 2.088954  | -0.357189          | 3.341390  | -2.077897 |
| H       | -1.362768 | 4.326344  | -1.041553 | 1.346411         | 4.341764  | 1.044025  | -1.350931          | 4.341778  | -1.010413 |
| C       | 1.151727  | 3.989591  | 0.105208  | -1.157124        | 3.984148  | -0.106311 | 1.173637           | 3.977952  | 0.102047  |
| H       | 1.783449  | 3.796757  | 0.984255  | -1.789636        | 3.783493  | -0.982846 | 1.811303           | 3.760482  | 0.959960  |
| H       | 0.764995  | 5.017517  | 0.171117  | -0.775645        | 5.013556  | -0.177826 | 0.799684           | 4.999721  | 0.196231  |
| H       | 1.781269  | 3.917387  | -0.793187 | -1.783912        | 3.912478  | 0.794074  | 1.785813           | 3.921848  | -0.798881 |
| C       | -2.713836 | -0.741781 | -0.056835 | 2.729085         | -0.743027 | 0.053619  | -2.688930          | -0.753726 | -0.058114 |
| H       | -2.245820 | -1.589348 | 0.475628  | 2.262015         | -1.583184 | -0.490519 | -2.237343          | -1.603900 | 0.459949  |
| C       | -3.488759 | -1.228120 | -1.316346 | 3.498149         | -1.246978 | 1.309736  | -3.467697          | -1.221840 | -1.319217 |
| H       | -3.128322 | -0.693088 | -2.205934 | 3.138108         | -0.723372 | 2.206480  | -3.106113          | -0.691927 | -2.200116 |
| H       | -3.341769 | -2.303225 | -1.495238 | 3.347625         | -2.323957 | 1.472849  | -3.334569          | -2.288978 | -1.499894 |
| C       | -4.955830 | -0.885056 | -0.985857 | 4.967130         | -0.902829 | 0.988814  | -4.929342          | -0.864754 | -0.985277 |
| H       | -5.692347 | -1.444591 | -1.581074 | 5.700311         | -1.472143 | 1.578664  | -5.666025          | -1.410248 | -1.576898 |
| C       | -5.019623 | -1.134146 | 0.551708  | 5.035553         | -1.131925 | -0.551526 | -4.994471          | -1.118338 | 0.548052  |
| C       | -3.831206 | -0.144489 | 0.852710  | 3.850335         | -0.135545 | -0.843604 | -3.796639          | -0.146713 | 0.850095  |
| C       | -4.314635 | 1.154609  | 0.162194  | 4.334434         | 1.153394  | -0.134881 | -4.264446          | 1.160655  | 0.167468  |

|   |           |           |           |           |           |           |           |           |           |
|---|-----------|-----------|-----------|-----------|-----------|-----------|-----------|-----------|-----------|
| H | -3.463477 | 1.793216  | -0.104411 | 3.483421  | 1.791004  | 0.135606  | -3.415105 | 1.785737  | -0.095929 |
| H | -4.954722 | 1.735382  | 0.842671  | 4.979384  | 1.740074  | -0.805539 | -4.893956 | 1.739738  | 0.844548  |
| C | -5.095522 | 0.650433  | -1.087746 | 5.109718  | 0.631055  | 1.111418  | -5.052944 | 0.671003  | -1.082518 |
| H | -6.149562 | 0.962842  | -1.063296 | 6.164483  | 0.941357  | 1.093371  | -6.094969 | 0.991847  | -1.052956 |
| H | -4.668656 | 1.028297  | -2.028176 | 4.680510  | 0.997300  | 2.055571  | -4.627124 | 1.045622  | -2.014724 |
| C | -6.349230 | -0.717354 | 1.195748  | 6.368354  | -0.709593 | -1.185457 | -6.320346 | -0.694071 | 1.195190  |
| H | -7.165214 | -1.355947 | 0.822289  | 7.180677  | -1.355277 | -0.816249 | -7.135007 | -1.313583 | 0.810887  |
| H | -6.625866 | 0.325134  | 0.996117  | 6.646417  | 0.329811  | -0.971864 | -6.584806 | 0.345702  | 1.014792  |
| H | -6.306940 | -0.846737 | 2.288298  | 6.329064  | -0.825563 | -2.279645 | -6.280703 | -0.840131 | 2.277297  |
| C | -4.760812 | -2.593425 | 0.959093  | 4.774767  | -2.585296 | -0.978840 | -4.757790 | -2.583034 | 0.950218  |
| H | -3.839578 | -3.018524 | 0.541424  | 3.851574  | -3.014214 | -0.569376 | -3.849768 | -3.019237 | 0.538527  |
| H | -5.595679 | -3.229558 | 0.625900  | 5.608105  | -3.226335 | -0.651261 | -5.595669 | -3.198472 | 0.612732  |
| H | -4.700291 | -2.683651 | 2.054681  | 4.717168  | -2.660087 | -2.075763 | -4.702182 | -2.675441 | 2.037471  |
| C | -3.425451 | 0.018883  | 2.306836  | 3.452254  | 0.047385  | -2.297605 | -3.393265 | 0.009375  | 2.304177  |
| H | -2.553385 | 0.682116  | 2.406835  | 2.587116  | 0.720412  | -2.393945 | -2.542209 | 0.684167  | 2.410025  |
| H | -3.147445 | -0.946707 | 2.757053  | 3.169622  | -0.911334 | -2.759545 | -3.103907 | -0.949440 | 2.741019  |
| H | -4.244173 | 0.453272  | 2.901024  | 4.277851  | 0.481405  | -2.882405 | -4.215975 | 0.419139  | 2.894819  |
| C | 3.658723  | 1.224406  | 0.410186  | -3.666872 | 1.223316  | -0.397166 | 3.638248  | 1.228601  | 0.426171  |
| H | 2.802679  | 1.339119  | 1.094080  | -2.818375 | 1.329796  | -1.091402 | 2.792404  | 1.363503  | 1.101485  |
| C | 4.636060  | 2.382166  | 0.650685  | -4.634502 | 2.392702  | -0.621370 | 4.630633  | 2.371105  | 0.665071  |
| H | 4.131900  | 3.346955  | 0.502812  | -4.118812 | 3.351404  | -0.474162 | 4.143174  | 3.333628  | 0.508514  |
| H | 5.489353  | 2.329907  | -0.043919 | -5.480565 | 2.344532  | 0.081929  | 5.480017  | 2.303305  | -0.019170 |
| H | 5.039078  | 2.341538  | 1.672803  | -5.045588 | 2.362222  | -1.640650 | 5.019706  | 2.332473  | 1.684162  |
| C | 4.303902  | -0.124917 | 0.699902  | -4.333533 | -0.116627 | -0.682883 | 4.254489  | -0.130386 | 0.720128  |
| C | 3.782867  | -0.956961 | 1.698836  | -3.850083 | -0.943533 | -1.705196 | 3.694864  | -0.964160 | 1.686560  |
| H | 2.902766  | -0.629838 | 2.258363  | -2.984417 | -0.619321 | -2.288527 | 2.814939  | -0.635014 | 2.226774  |
| C | 4.353371  | -2.205604 | 1.963143  | -4.441028 | -2.184115 | -1.965969 | 4.231666  | -2.223267 | 1.942665  |
| H | 3.927573  | -2.844032 | 2.740338  | -4.043401 | -2.819227 | -2.760604 | 3.776322  | -2.861210 | 2.690720  |
| C | 5.459166  | -2.640230 | 1.227389  | -5.531384 | -2.614300 | -1.203887 | 5.342383  | -2.665754 | 1.230983  |
| H | 5.903304  | -3.617414 | 1.426675  | -5.991411 | -3.584800 | -1.400187 | 5.758705  | -3.647082 | 1.422910  |
| C | 5.992167  | -1.815156 | 0.231026  | -6.028100 | -1.792833 | -0.184872 | 5.914017  | -1.837867 | 0.266558  |
| H | 6.855326  | -2.147543 | -0.349636 | -6.879014 | -2.121438 | 0.415773  | 6.777835  | -2.174851 | -0.293926 |
| C | 5.419820  | -0.567671 | -0.025679 | -5.434830 | -0.553929 | 0.069025  | 5.374452  | -0.580813 | 0.017571  |
| H | 5.839976  | 0.061090  | -0.815436 | -5.825495 | 0.071314  | 0.876291  | 5.821108  | 0.046263  | -0.745556 |

## 5-S

*cis*-N<sub>endo</sub>-O<sub>exo</sub>-5-S

| Element | PBE/TZVP  |           |           | PBE/TZVP (CHCl <sub>3</sub> ) |           |           | B3LYP/TZVP (CHCl <sub>3</sub> ) |           |           |
|---------|-----------|-----------|-----------|-------------------------------|-----------|-----------|---------------------------------|-----------|-----------|
|         | X         | Y         | Z         | X                             | Y         | Z         | X                               | Y         | Z         |
| P       | -2.303718 | -1.224410 | 0.265326  | -2.305231                     | -1.225425 | 0.283171  | -2.350242                       | -1.150668 | 0.266583  |
| O       | 1.054588  | -0.379205 | 0.281683  | 1.069005                      | -0.368735 | 0.267597  | 1.018965                        | -0.417607 | 0.313845  |
| N       | -1.418907 | -0.345925 | 1.394213  | -1.398749                     | -0.340733 | 1.396913  | -1.449138                       | -0.293956 | 1.387622  |
| C       | -1.835768 | 0.524990  | 2.534220  | -1.802077                     | 0.516991  | 2.550241  | -1.846097                       | 0.621825  | 2.497134  |
| P       | 0.089997  | -1.315270 | 1.268878  | 0.100956                      | -1.312380 | 1.254862  | 0.013566                        | -1.303928 | 1.285868  |
| N       | -0.921567 | -2.143962 | 0.051278  | -0.911671                     | -2.124880 | 0.036448  | -0.998945                       | -2.105773 | 0.074473  |
| C       | -0.641393 | 1.423549  | 2.880534  | -0.612182                     | 1.428820  | 2.877329  | -0.630323                       | 1.488872  | 2.839543  |
| H       | -0.903101 | 2.083315  | 3.719070  | -0.866578                     | 2.078763  | 3.725810  | -0.885560                       | 2.175633  | 3.647220  |
| H       | 0.232265  | 0.828992  | 3.190612  | 0.275257                      | 0.843480  | 3.164159  | 0.212780                        | 0.882748  | 3.178747  |
| H       | -0.361509 | 2.044054  | 2.019842  | -0.358491                     | 2.058654  | 2.015023  | -0.320128                       | 2.070410  | 1.973617  |
| N       | -2.861735 | -0.480360 | -1.112010 | -2.886102                     | -0.476304 | -1.077473 | -2.851809                       | -0.397009 | -1.107712 |
| H       | -3.870610 | -0.366633 | -1.208647 | -3.898307                     | -0.390364 | -1.170784 | -3.846735                       | -0.277170 | -1.244239 |
| C       | -3.015387 | 1.397099  | 2.084189  | -3.001640                     | 1.377387  | 2.130567  | -2.987734                       | 1.523947  | 2.014751  |
| H       | -3.302289 | 2.073005  | 2.901398  | -3.266396                     | 2.056321  | 2.952797  | -3.246915                       | 2.229232  | 2.804999  |
| H       | -2.751776 | 2.003328  | 1.208361  | -2.765614                     | 1.979797  | 1.243878  | -2.694876                       | 2.088219  | 1.131482  |
| H       | -3.904741 | 0.794379  | 1.842003  | -3.891908                     | 0.766645  | 1.917550  | -3.890903                       | 0.954613  | 1.784873  |
| C       | -2.222873 | -0.331867 | 3.750410  | -2.152372                     | -0.351092 | 3.769812  | -2.279421                       | -0.191070 | 3.724961  |
| H       | -2.475343 | 0.311148  | 4.605612  | -2.396004                     | 0.286261  | 4.631957  | -2.533211                       | 0.477027  | 4.549716  |
| H       | -3.099631 | -0.961025 | 3.538712  | -3.021722                     | -0.993898 | 3.571093  | -3.156351                       | -0.802228 | 3.506835  |
| H       | -1.390915 | -0.985089 | 4.051821  | -1.302829                     | -0.991703 | 4.048461  | -1.474797                       | -0.849794 | 4.056745  |
| C       | -0.555353 | -3.255031 | -0.875761 | -0.560985                     | -3.242911 | -0.886072 | -0.668186                       | -3.234981 | -0.840785 |
| C       | 0.070804  | -2.684703 | -2.158519 | 0.101079                      | -2.686296 | -2.157044 | 0.021573                        | -2.698794 | -2.102299 |
| H       | 0.433893  | -3.500370 | -2.799730 | 0.449135                      | -3.512429 | -2.793137 | 0.364283                        | -3.528142 | -2.722913 |
| H       | -0.668260 | -2.110274 | -2.734263 | -0.611236                     | -2.087834 | -2.741451 | -0.667328                       | -2.099084 | -2.696620 |
| H       | 0.915528  | -2.024945 | -1.922652 | 0.960608                      | -2.051834 | -1.906552 | 0.878483                        | -2.079896 | -1.843372 |
| C       | -1.816603 | -4.059354 | -1.218805 | -1.838481                     | -4.009271 | -1.253852 | -1.959695                       | -3.966501 | -1.222830 |
| H       | -1.552465 | -4.881746 | -1.897584 | -1.583398                     | -4.833134 | -1.934289 | -1.720082                       | -4.798975 | -1.884901 |
| H       | -2.269411 | -4.498738 | -0.318362 | -2.317361                     | -4.439993 | -0.362956 | -2.462757                       | -4.368064 | -0.342098 |
| H       | -2.561680 | -3.436607 | -1.737514 | -2.556854                     | -3.360752 | -1.778113 | -2.645796                       | -3.309009 | -1.761229 |
| C       | 0.446571  | -4.156520 | -0.140751 | 0.404531                      | -4.174992 | -0.140450 | 0.261882                        | -4.193835 | -0.088418 |
| H       | 0.740810  | -4.990685 | -0.792262 | 0.688575                      | -5.010928 | -0.794264 | 0.514171                        | -5.037317 | -0.731738 |
| H       | 1.363130  | -3.610581 | 0.128236  | 1.328824                      | -3.653351 | 0.150399  | 1.196825                        | -3.708618 | 0.197749  |
| H       | 0.006776  | -4.570198 | 0.777645  | -0.064446                     | -4.581528 | 0.766570  | -0.219207                       | -4.574798 | 0.813466  |
| C       | 2.407288  | -0.052033 | 0.755988  | 2.414099                      | -0.040427 | 0.743791  | 2.366444                        | -0.115858 | 0.777749  |
| H       | 2.599323  | -0.674416 | 1.645878  | 2.604648                      | -0.652788 | 1.640756  | 2.550303                        | -0.727422 | 1.663232  |
| C       | 2.564812  | 1.461069  | 1.065712  | 2.573477                      | 1.475815  | 1.040085  | 2.559750                        | 1.393633  | 1.079262  |
| H       | 1.650209  | 2.008146  | 0.799932  | 1.660344                      | 2.020302  | 0.766135  | 1.664735                        | 1.955542  | 0.821364  |
| H       | 2.748667  | 1.633454  | 2.135275  | 2.752834                      | 1.657175  | 2.108767  | 2.753467                        | 1.563302  | 2.138073  |
| C       | 3.762062  | 1.875652  | 0.183935  | 3.772936                      | 1.882205  | 0.157955  | 3.760092                        | 1.775885  | 0.189036  |
| H       | 4.264221  | 2.793645  | 0.518654  | 4.275336                      | 2.803360  | 0.484769  | 4.280582                        | 2.677340  | 0.512868  |
| C       | 4.647311  | 0.591769  | 0.197260  | 4.658231                      | 0.598970  | 0.185509  | 4.615816                        | 0.476488  | 0.202983  |

|   |           |           |           |           |           |           |           |           |           |
|---|-----------|-----------|-----------|-----------|-----------|-----------|-----------|-----------|-----------|
| C | 3.478307  | -0.330430 | -0.326171 | 3.491639  | -0.328271 | -0.331488 | 3.427324  | -0.419887 | -0.304770 |
| C | 3.028030  | 0.419802  | -1.608749 | 3.044868  | 0.408368  | -1.623123 | 2.986260  | 0.328127  | -1.589910 |
| H | 1.981461  | 0.192005  | -1.854100 | 1.998965  | 0.177944  | -1.866767 | 1.942841  | 0.124523  | -1.823996 |
| H | 3.632140  | 0.094530  | -2.467136 | 3.652389  | 0.075183  | -2.476475 | 3.574657  | -0.010557 | -2.442769 |
| C | 3.255683  | 1.924092  | -1.273038 | 3.270431  | 1.916177  | -1.301124 | 3.247125  | 1.828497  | -1.264391 |
| H | 3.997732  | 2.380356  | -1.941984 | 4.014573  | 2.366428  | -1.972738 | 3.990649  | 2.260451  | -1.934086 |
| H | 2.338186  | 2.524220  | -1.363241 | 2.351658  | 2.513182  | -1.397481 | 2.348690  | 2.440395  | -1.352748 |
| C | 5.850008  | 0.652529  | -0.753870 | 5.863848  | 0.651176  | -0.762646 | 5.817357  | 0.507274  | -0.751330 |
| H | 5.581276  | 0.853353  | -1.798005 | 5.595698  | 0.844327  | -1.808503 | 5.552881  | 0.699621  | -1.788815 |
| H | 6.541495  | 1.445355  | -0.430992 | 6.554922  | 1.446252  | -0.442914 | 6.516417  | 1.286710  | -0.438527 |
| H | 6.409567  | -0.294574 | -0.730967 | 6.420022  | -0.298074 | -0.731549 | 6.352821  | -0.444212 | -0.719937 |
| C | 5.188555  | 0.219660  | 1.587025  | 5.195903  | 0.241555  | 1.580508  | 5.163345  | 0.103844  | 1.590108  |
| H | 5.678170  | -0.765499 | 1.561280  | 5.683132  | -0.745327 | 1.565375  | 5.629500  | -0.883653 | 1.563887  |
| H | 5.949871  | 0.950516  | 1.897858  | 5.956638  | 0.976669  | 1.884339  | 5.933268  | 0.820597  | 1.884932  |
| H | 4.427964  | 0.191452  | 2.378164  | 4.431223  | 0.222608  | 2.367547  | 4.415738  | 0.092949  | 2.381249  |
| C | 3.799038  | -1.800022 | -0.530203 | 3.812977  | -1.799898 | -0.519077 | 3.711850  | -1.896312 | -0.499973 |
| H | 4.092114  | -2.287119 | 0.412764  | 4.110571  | -2.272871 | 0.429560  | 4.007297  | -2.373706 | 0.437351  |
| H | 2.934341  | -2.345416 | -0.936236 | 2.944911  | -2.350692 | -0.909400 | 2.833205  | -2.419996 | -0.878356 |
| H | 4.623090  | -1.926048 | -1.247296 | 4.632424  | -1.933761 | -1.240559 | 4.514678  | -2.044154 | -1.224697 |
| C | -2.022250 | 0.410908  | -1.960722 | -2.061696 | 0.399957  | -1.948206 | -1.958597 | 0.417866  | -1.968312 |
| H | -0.993232 | 0.034527  | -1.853270 | -1.029688 | 0.028727  | -1.852921 | -0.963465 | -0.011165 | -1.851675 |
| C | -2.455486 | 0.259059  | -3.419469 | -2.513373 | 0.226853  | -3.399306 | -2.387548 | 0.257102  | -3.425143 |
| H | -1.816163 | 0.877459  | -4.063236 | -1.878939 | 0.831552  | -4.060793 | -1.709235 | 0.812157  | -4.073138 |
| H | -2.381616 | -0.787475 | -3.746797 | -2.442886 | -0.826709 | -3.704174 | -2.372348 | -0.794429 | -3.714480 |
| H | -3.493634 | 0.594184  | -3.564508 | -3.554022 | 0.557026  | -3.536377 | -3.396555 | 0.641517  | -3.586548 |
| C | -2.036661 | 1.851046  | -1.477275 | -2.071256 | 1.846362  | -1.479769 | -1.888659 | 1.861851  | -1.508046 |
| C | -3.208805 | 2.620988  | -1.501633 | -3.245607 | 2.613130  | -1.497629 | -2.993795 | 2.710800  | -1.588680 |
| H | -4.141154 | 2.198688  | -1.886961 | -4.179067 | 2.181509  | -1.866867 | -3.928047 | 2.354810  | -2.006447 |
| C | -3.200708 | 3.937743  | -1.035985 | -3.238104 | 3.931488  | -1.035779 | -2.911633 | 4.019750  | -1.126178 |
| H | -4.118342 | 4.528134  | -1.059277 | -4.159154 | 4.517197  | -1.050814 | -3.776453 | 4.668487  | -1.189637 |
| C | -2.016559 | 4.503497  | -0.550383 | -2.052830 | 4.502001  | -0.557357 | -1.719901 | 4.497872  | -0.584629 |
| H | -2.010187 | 5.534510  | -0.192968 | -2.047982 | 5.532188  | -0.196861 | -1.657208 | 5.517406  | -0.225482 |
| C | -0.842506 | 3.745892  | -0.533345 | -0.876789 | 3.746760  | -0.544361 | -0.612898 | 3.658965  | -0.508110 |
| H | 0.086881  | 4.184327  | -0.163293 | 0.051757  | 4.185109  | -0.172156 | 0.316615  | 4.022873  | -0.087019 |
| C | -0.855571 | 2.425734  | -0.992201 | -0.888940 | 2.425797  | -1.002451 | -0.700883 | 2.347582  | -0.965574 |
| H | 0.054550  | 1.822681  | -0.960845 | 0.021784  | 1.823669  | -0.970514 | 0.147437  | 1.681903  | -0.878355 |
| C | -3.756926 | -2.105575 | 0.914537  | -3.735476 | -2.114762 | 0.956556  | -3.824605 | -1.970988 | 0.917852  |
| H | -3.428031 | -2.722716 | 1.759257  | -3.385964 | -2.732054 | 1.792362  | -3.522717 | -2.575529 | 1.770874  |
| H | -4.512762 | -1.388612 | 1.262049  | -4.487767 | -1.399302 | 1.314362  | -4.556794 | -1.228180 | 1.232784  |
| H | -4.185946 | -2.747705 | 0.135231  | -4.175130 | -2.751980 | 0.179546  | -4.260244 | -2.607142 | 0.149551  |

*trans*-N<sub>endo</sub>-O<sub>exo</sub>-5-S

| Element | PBE/TZVP  |           |           | PBE/TZVP (CHCl3) |           |           | B3LYP/TZVP (CHCl3) |           |           |
|---------|-----------|-----------|-----------|------------------|-----------|-----------|--------------------|-----------|-----------|
|         | X         | y         | z         | x                | y         | z         | x                  | y         | z         |
| P       | 1.406402  | 0.822177  | 1.070458  | 1.417737         | 0.842951  | 1.093004  | 1.408141           | 0.836935  | 1.079634  |
| O       | -1.800546 | 0.108239  | 0.232624  | -1.805340        | 0.097447  | 0.250550  | -1.774964          | 0.085985  | 0.209975  |
| N       | 0.766674  | -0.582362 | 0.401934  | 0.765715         | -0.571979 | 0.448210  | 0.775981           | -0.571370 | 0.431514  |
| C       | 0.860511  | -2.025326 | 0.780649  | 0.869647         | -2.009701 | 0.836601  | 0.883738           | -2.007299 | 0.825210  |
| P       | -0.408714 | 0.214032  | -0.684388 | -0.396293        | 0.207227  | -0.654440 | -0.375153          | 0.200466  | -0.671682 |
| N       | 0.427021  | 1.657970  | 0.007637  | 0.423071         | 1.658177  | 0.020958  | 0.425411           | 1.644583  | 0.008061  |
| C       | 0.740752  | -2.844151 | -0.511945 | 0.757143         | -2.841993 | -0.448210 | 0.788812           | -2.850203 | -0.451410 |
| H       | 0.777864  | -3.916960 | -0.278033 | 0.807110         | -3.911657 | -0.202384 | 0.860610           | -3.908627 | -0.198381 |
| H       | -0.213001 | -2.651447 | -1.026376 | -0.199188        | -2.664450 | -0.963162 | -0.162486          | -2.698634 | -0.964863 |
| H       | 1.564334  | -2.607231 | -1.199017 | 1.576663         | -2.600916 | -1.138735 | 1.598052           | -2.600226 | -1.137085 |
| N       | 3.027132  | 1.141704  | 0.906765  | 3.035708         | 1.135665  | 0.891021  | 3.013544           | 1.136713  | 0.885966  |
| H       | 3.587415  | 1.114737  | 1.757774  | 3.603615         | 1.184219  | 1.736142  | 3.579588           | 1.189790  | 1.721880  |
| C       | 2.228066  | -2.285556 | 1.426084  | 2.237450         | -2.257309 | 1.486768  | 2.242652           | -2.249148 | 1.491327  |
| H       | 2.307461  | -3.351436 | 1.679564  | 2.320570         | -3.322015 | 1.744083  | 2.322921           | -3.303636 | 1.756236  |
| H       | 3.052968  | -2.031149 | 0.750428  | 3.060516         | -2.001131 | 0.809244  | 3.065114           | -2.000526 | 0.825609  |
| H       | 2.350252  | -1.726199 | 2.367230  | 2.354973         | -1.690449 | 2.423259  | 2.350703           | -1.678692 | 2.416688  |
| C       | -0.259166 | -2.396718 | 1.764936  | -0.248657        | -2.380369 | 1.823255  | -0.244369          | -2.371265 | 1.798512  |
| H       | -0.187904 | -3.461048 | 2.030520  | -0.170126        | -3.442538 | 2.095982  | -0.165229          | -3.421183 | 2.085408  |
| H       | -0.182009 | -1.811634 | 2.693332  | -0.174195        | -1.784992 | 2.744806  | -0.187184          | -1.764974 | 2.704281  |
| H       | -1.248522 | -2.213483 | 1.330326  | -1.237840        | -2.206149 | 1.383933  | -1.218555          | -2.208735 | 1.344555  |
| C       | 0.315428  | 3.085191  | -0.411511 | 0.306828         | 3.079768  | -0.414045 | 0.293732           | 3.071147  | -0.404553 |
| C       | 1.117556  | 3.322791  | -1.700909 | 1.066644         | 3.293907  | -1.733004 | 1.047099           | 3.306524  | -1.720373 |
| H       | 0.953495  | 4.346003  | -2.067775 | 0.893209         | 4.312731  | -2.107707 | 0.874028           | 4.323832  | -2.075043 |
| H       | 2.195703  | 3.198589  | -1.532739 | 2.149164         | 3.166313  | -1.600092 | 2.121012           | 3.176456  | -1.591764 |
| H       | 0.802498  | 2.625998  | -2.491283 | 0.721863         | 2.585705  | -2.500442 | 0.703853           | 2.615612  | -2.492300 |
| C       | 0.836990  | 3.982418  | 0.719514  | 0.869413         | 3.988644  | 0.687741  | 0.855985           | 3.970548  | 0.702576  |
| H       | 0.762381  | 5.035487  | 0.415633  | 0.789137         | 5.036872  | 0.368786  | 0.760972           | 5.014052  | 0.401051  |
| H       | 0.239571  | 3.854964  | 1.633973  | 0.300834         | 3.875267  | 1.621951  | 0.302224           | 3.838784  | 1.633574  |
| H       | 1.894063  | 3.777738  | 0.945241  | 1.931462         | 3.782191  | 0.884969  | 1.913682           | 3.775294  | 0.885855  |
| C       | -1.168653 | 3.385120  | -0.662718 | -1.182438        | 3.388330  | -0.619717 | -1.196113          | 3.374399  | -0.596058 |
| H       | -1.291234 | 4.434414  | -0.964447 | -1.305684        | 4.437304  | -0.922147 | -1.326721          | 4.420746  | -0.873977 |
| H       | -1.570933 | 2.760795  | -1.475911 | -1.614687        | 2.762688  | -1.415996 | -1.628084          | 2.767037  | -1.394498 |
| H       | -1.765787 | 3.206920  | 0.240543  | -1.748790        | 3.219513  | 0.305009  | -1.750172          | 3.184820  | 0.321733  |
| C       | -3.081869 | 0.160998  | -0.488677 | -3.070423        | 0.153503  | -0.485449 | -3.047614          | 0.156221  | -0.493905 |
| H       | -2.846611 | 0.277988  | -1.560196 | -2.824257        | 0.270179  | -1.554431 | -2.827092          | 0.288319  | -1.555310 |
| C       | -3.984476 | 1.310616  | 0.031966  | -3.980764        | 1.304625  | 0.021786  | -3.945291          | 1.299703  | 0.045265  |
| H       | -3.534077 | 1.780864  | 0.917674  | -3.539089        | 1.778969  | 0.909282  | -3.493192          | 1.752342  | 0.927184  |
| H       | -4.118392 | 2.093776  | -0.726857 | -4.106497        | 2.084731  | -0.741302 | -4.077910          | 2.086394  | -0.696523 |
| C       | -5.305800 | 0.588861  | 0.379850  | -5.304993        | 0.584124  | 0.358227  | -5.266429          | 0.576686  | 0.386168  |
| H       | -6.181567 | 1.251885  | 0.396544  | -6.181905        | 1.246497  | 0.366496  | -6.134937          | 1.235108  | 0.412169  |
| C       | -5.356897 | -0.553313 | -0.681417 | -5.347684        | -0.558256 | -0.702723 | -5.323523          | -0.551659 | -0.684717 |
| C       | -3.935710 | -1.111440 | -0.280937 | -3.932172        | -1.118115 | -0.289307 | -3.906253          | -1.112722 | -0.297882 |
| C       | -4.088806 | -1.310391 | 1.252128  | -4.101001        | -1.319550 | 1.241280  | -4.051576          | -1.331870 | 1.231493  |

|   |           |           |           |           |           |           |           |           |           |
|---|-----------|-----------|-----------|-----------|-----------|-----------|-----------|-----------|-----------|
| H | -3.117547 | -1.243565 | 1.758967  | -3.133141 | -1.257870 | 1.754748  | -3.086259 | -1.269523 | 1.728387  |
| H | -4.491356 | -2.310663 | 1.464953  | -4.510845 | -2.318350 | 1.448458  | -4.452259 | -2.325430 | 1.433800  |
| C | -5.064563 | -0.179863 | 1.694200  | -5.075861 | -0.185002 | 1.675280  | -5.023937 | -0.206426 | 1.690454  |
| H | -6.000634 | -0.586304 | 2.100442  | -6.016425 | -0.588650 | 2.075451  | -5.952173 | -0.614211 | 2.090822  |
| H | -4.634486 | 0.470477  | 2.469645  | -4.646861 | 0.465492  | 2.451368  | -4.591463 | 0.428717  | 2.465126  |
| C | -6.490370 | -1.564060 | -0.461104 | -6.486577 | -1.565422 | -0.493304 | -6.461762 | -1.559771 | -0.476502 |
| H | -6.465341 | -2.050930 | 0.521243  | -6.472956 | -2.048543 | 0.491288  | -6.433904 | -2.063710 | 0.487180  |
| H | -7.464588 | -1.061552 | -0.558439 | -7.457833 | -1.059051 | -0.604328 | -7.425508 | -1.050923 | -0.556835 |
| H | -6.455527 | -2.355351 | -1.224924 | -6.442173 | -2.359486 | -1.254114 | -6.432522 | -2.329952 | -1.250498 |
| C | -5.473330 | -0.052544 | -2.130189 | -5.449173 | -0.057288 | -2.152487 | -5.450089 | -0.034418 | -2.126798 |
| H | -5.334734 | -0.881282 | -2.840953 | -5.310536 | -0.888912 | -2.860183 | -5.319043 | -0.851761 | -2.839628 |
| H | -6.480823 | 0.354674  | -2.301989 | -6.452398 | 0.358865  | -2.330753 | -6.450523 | 0.376136  | -2.281570 |
| H | -4.758950 | 0.737504  | -2.396443 | -4.724148 | 0.724958  | -2.411389 | -4.739561 | 0.747809  | -2.388397 |
| C | -3.433302 | -2.330746 | -1.032520 | -3.422569 | -2.338032 | -1.035146 | -3.403406 | -2.322842 | -1.060314 |
| H | -3.333825 | -2.132338 | -2.110927 | -3.305996 | -2.136434 | -2.111192 | -3.306054 | -2.112471 | -2.128034 |
| H | -2.449562 | -2.653348 | -0.658763 | -2.444629 | -2.660343 | -0.647086 | -2.425615 | -2.638365 | -0.691637 |
| H | -4.118549 | -3.181195 | -0.904844 | -4.111803 | -3.187215 | -0.917697 | -4.082822 | -3.168726 | -0.940189 |
| C | 3.785671  | 1.084470  | -0.371637 | 3.767680  | 1.074150  | -0.397987 | 3.742203  | 1.082382  | -0.403991 |
| H | 3.035945  | 1.223861  | -1.165083 | 3.007339  | 1.205179  | -1.182342 | 2.989567  | 1.217340  | -1.180444 |
| C | 4.777026  | 2.249620  | -0.415987 | 4.755364  | 2.241058  | -0.470746 | 4.725984  | 2.249794  | -0.473451 |
| H | 5.316795  | 2.244229  | -1.372281 | 5.276860  | 2.227533  | -1.437056 | 5.241770  | 2.242037  | -1.433759 |
| H | 4.260819  | 3.213525  | -0.304805 | 4.236055  | 3.203297  | -0.361452 | 4.206133  | 3.201566  | -0.359552 |
| H | 5.525091  | 2.164174  | 0.386364  | 5.513772  | 2.165452  | 0.322267  | 5.478826  | 2.173979  | 0.313217  |
| C | 4.447219  | -0.264041 | -0.595987 | 4.431514  | -0.274047 | -0.626184 | 4.401480  | -0.264696 | -0.630281 |
| C | 5.438660  | -0.739880 | 0.275105  | 5.437585  | -0.743759 | 0.231785  | 5.412439  | -0.723624 | 0.216748  |
| H | 5.763181  | -0.135483 | 1.126948  | 5.769278  | -0.136093 | 1.077733  | 5.753374  | -0.109680 | 1.042403  |
| C | 6.023832  | -1.990429 | 0.068021  | 6.019906  | -1.995726 | 0.022359  | 5.983858  | -1.975353 | 0.020413  |
| H | 6.792510  | -2.351171 | 0.753640  | 6.796781  | -2.353191 | 0.700748  | 6.762362  | -2.322978 | 0.688032  |
| C | 5.632346  | -2.776228 | -1.021439 | 5.610368  | -2.790132 | -1.054877 | 5.556847  | -2.781752 | -1.032974 |
| H | 6.093435  | -3.751481 | -1.185552 | 6.065046  | -3.768909 | -1.217293 | 6.001152  | -3.757298 | -1.185130 |
| C | 4.657221  | -2.303646 | -1.903059 | 4.620243  | -2.323162 | -1.923167 | 4.559586  | -2.326675 | -1.888554 |
| H | 4.354628  | -2.907792 | -2.760311 | 4.297331  | -2.935396 | -2.767295 | 4.222274  | -2.946946 | -2.709618 |
| C | 4.067729  | -1.054173 | -1.688266 | 4.035223  | -1.071331 | -1.707461 | 3.985832  | -1.074267 | -1.685386 |
| H | 3.300579  | -0.689305 | -2.376735 | 3.254563  | -0.711964 | -2.382892 | 3.199012  | -0.730242 | -2.346796 |
| C | 1.081359  | 1.056772  | 2.846780  | 1.119220  | 1.114244  | 2.864117  | 1.091106  | 1.099020  | 2.842684  |
| H | 0.000553  | 0.933577  | 2.992131  | 0.037417  | 1.029718  | 3.026060  | 0.017326  | 1.007776  | 2.997445  |
| H | 1.615749  | 0.300924  | 3.438559  | 1.641614  | 0.352396  | 3.458069  | 1.612488  | 0.347318  | 3.434642  |
| H | 1.387373  | 2.062904  | 3.161023  | 1.464916  | 2.114394  | 3.154835  | 1.426620  | 2.093204  | 3.134477  |

## 8-R

*cis*-N<sub>endo</sub>-O<sub>exo</sub>-8-R

| Elements | PBE/TZVP  |           |           | PBE/TZVP (CHCl3) |           |           | B3LYP/TZVP (CHCl3) |           |           |
|----------|-----------|-----------|-----------|------------------|-----------|-----------|--------------------|-----------|-----------|
|          | X         | y         | z         | x                | y         | z         | x                  | y         | z         |
| P        | -2.900583 | -0.006851 | -0.140280 | -2.905759        | -0.024625 | -0.136537 | -2.899312          | 0.111262  | -0.159913 |
| P        | -1.179873 | -1.788800 | 0.637379  | -1.169167        | -1.786179 | 0.650471  | -1.290046          | -1.726530 | 0.660286  |
| N        | -2.023525 | -0.313103 | 1.257498  | -2.007442        | -0.311415 | 1.257050  | -2.064111          | -0.223868 | 1.246093  |
| N        | -2.207371 | -1.404502 | -0.763883 | -2.191869        | -1.421400 | -0.751057 | -2.264533          | -1.318414 | -0.752157 |
| N        | -2.543525 | 1.416194  | -0.913096 | -2.556359        | 1.399476  | -0.905892 | -2.447640          | 1.490428  | -0.931885 |
| H        | -3.300487 | 2.032112  | -1.201450 | -3.321485        | 1.981524  | -1.239463 | -3.161566          | 2.110230  | -1.285088 |
| C        | -2.241936 | 0.039118  | 2.691427  | -2.222290        | 0.049207  | 2.689200  | -2.248228          | 0.198256  | 2.664685  |
| C        | -2.716341 | 1.494595  | 2.791011  | -2.724251        | 1.495811  | 2.780949  | -2.708219          | 1.659195  | 2.712021  |
| H        | -2.859664 | 1.761747  | 3.846924  | -2.869963        | 1.761767  | 3.836864  | -2.819113          | 1.966761  | 3.752183  |
| H        | -3.679808 | 1.653991  | 2.284035  | -3.689762        | 1.634992  | 2.273485  | -3.675617          | 1.802261  | 2.228767  |
| H        | -1.977594 | 2.183341  | 2.360653  | -1.997109        | 2.195376  | 2.348531  | -1.982590          | 2.317830  | 2.238244  |
| C        | -3.276037 | -0.907209 | 3.323510  | -3.232887        | -0.911815 | 3.336068  | -3.285276          | -0.703286 | 3.348916  |
| H        | -2.957589 | -1.955439 | 3.227966  | -2.886921        | -1.952634 | 3.256036  | -2.977215          | -1.749508 | 3.311059  |
| H        | -4.262527 | -0.799286 | 2.849247  | -4.219523        | -0.836056 | 2.857249  | -4.260289          | -0.613390 | 2.867041  |
| H        | -3.395492 | -0.685911 | 4.393727  | -3.355858        | -0.673826 | 4.402265  | -3.399614          | -0.420930 | 4.396819  |
| C        | -0.888216 | -0.106006 | 3.401091  | -0.861814        | -0.061659 | 3.391779  | -0.888130          | 0.074967  | 3.360764  |
| H        | -0.518541 | -1.142245 | 3.349043  | -0.466915        | -1.088707 | 3.342910  | -0.527052          | -0.956161 | 3.355939  |
| H        | -0.992615 | 0.150904  | 4.464117  | -0.969695        | 0.198812  | 4.453656  | -0.975831          | 0.385158  | 4.402522  |
| H        | -0.136671 | 0.555817  | 2.950446  | -0.130341        | 0.617551  | 2.934186  | -0.147014          | 0.704209  | 2.869248  |
| C        | -2.188005 | -2.003424 | -2.131905 | -2.178670        | -2.041291 | -2.107918 | -2.269156          | -1.934472 | -2.109915 |
| C        | -1.089100 | -1.358851 | -2.990184 | -1.072542        | -1.420529 | -2.975403 | -1.093247          | -1.405574 | -2.940311 |
| H        | -0.105328 | -1.479679 | -2.520494 | -0.089285        | -1.550782 | -2.507270 | -0.146465          | -1.634430 | -2.456769 |
| H        | -1.277130 | -0.284855 | -3.129765 | -1.246407        | -0.345309 | -3.122316 | -1.160975          | -0.324560 | -3.066511 |
| H        | -1.061528 | -1.829182 | -3.983352 | -1.056297        | -1.901391 | -3.963944 | -1.098624          | -1.865186 | -3.930048 |
| C        | -3.560733 | -1.785268 | -2.783173 | -3.546724        | -1.819316 | -2.767444 | -3.594177          | -1.596234 | -2.802687 |
| H        | -4.366094 | -2.233168 | -2.183610 | -4.358864        | -2.243038 | -2.160184 | -4.446705          | -1.946623 | -2.219268 |
| H        | -3.575044 | -2.257019 | -3.775095 | -3.560723        | -2.313271 | -3.748585 | -3.626264          | -2.084269 | -3.776976 |
| H        | -3.768656 | -0.714331 | -2.934674 | -3.740260        | -0.749723 | -2.941808 | -3.692755          | -0.522191 | -2.976652 |
| C        | -1.927530 | -3.506661 | -1.965651 | -1.933515        | -3.544770 | -1.919031 | -2.157838          | -3.452918 | -1.933828 |
| H        | -2.712576 | -3.981765 | -1.360822 | -2.726677        | -3.999947 | -1.309406 | -2.990640          | -3.838780 | -1.344390 |
| H        | -0.955295 | -3.696439 | -1.486037 | -0.965519        | -3.736862 | -1.431531 | -1.225072          | -3.733102 | -1.440381 |
| H        | -1.906085 | -3.990128 | -2.951856 | -1.913527        | -4.042242 | -2.898276 | -2.168857          | -3.936087 | -2.911414 |
| O        | 0.261858  | -1.166867 | 0.082916  | 0.278821         | -1.165992 | 0.087368  | 0.179429           | -1.189379 | 0.125745  |
| C        | 1.511751  | -1.577335 | 0.735461  | 1.523648         | -1.572553 | 0.735909  | 1.405531           | -1.618554 | 0.776133  |
| H        | 1.259362  | -2.373918 | 1.455673  | 1.278433         | -2.373947 | 1.452914  | 1.141666           | -2.390839 | 1.501973  |
| C        | 2.218221  | -0.376627 | 1.418263  | 2.229744         | -0.373577 | 1.424716  | 2.146944           | -0.431200 | 1.441411  |
| H        | 1.685074  | 0.560553  | 1.203577  | 1.688663         | 0.561079  | 1.221119  | 1.637498           | 0.505866  | 1.221808  |
| H        | 2.253424  | -0.499419 | 2.509759  | 2.270807         | -0.504591 | 2.514908  | 2.185093           | -0.542036 | 2.524779  |
| C        | 3.622323  | -0.390266 | 0.775246  | 3.629819         | -0.373099 | 0.773737  | 3.544324           | -0.487098 | 0.789445  |
| H        | 4.387013  | 0.127586  | 1.370389  | 4.395488         | 0.146676  | 1.366702  | 4.320568           | 0.014126  | 1.367977  |
| C        | 3.874071  | -1.913699 | 0.548127  | 3.891558         | -1.892831 | 0.536101  | 3.757708           | -2.014904 | 0.575545  |



|   |           |           |           |           |           |           |           |           |           |
|---|-----------|-----------|-----------|-----------|-----------|-----------|-----------|-----------|-----------|
| C | 2.547942  | -2.099433 | -0.287043 | 2.563119  | -2.083958 | -0.291858 | 2.424839  | -2.176098 | -0.242638 |
| C | 2.702200  | -1.004482 | -1.376844 | 2.703686  | -0.983571 | -1.377927 | 2.595542  | -1.100965 | -1.347229 |
| H | 3.264209  | -1.404613 | -2.232418 | 3.265700  | -1.374930 | -2.238012 | 3.138844  | -1.518951 | -2.195212 |
| H | 1.724975  | -0.684417 | -1.761058 | 1.721031  | -0.670598 | -1.753192 | 1.631831  | -0.763573 | -1.721079 |
| C | 3.462473  | 0.149349  | -0.661360 | 3.457975  | 0.172700  | -0.659711 | 3.386620  | 0.041671  | -0.650292 |
| H | 4.437439  | 0.345323  | -1.128283 | 4.428995  | 0.380391  | -1.131091 | 4.354489  | 0.210312  | -1.122708 |
| H | 2.906234  | 1.096058  | -0.676608 | 2.891813  | 1.113698  | -0.664754 | 2.853174  | 0.989950  | -0.670536 |
| C | 3.941127  | -2.737701 | 1.844208  | 3.972083  | -2.722886 | 1.827459  | 3.820777  | -2.826840 | 1.879235  |
| H | 3.967302  | -3.814594 | 1.618834  | 4.008462  | -3.798099 | 1.594237  | 3.824791  | -3.897641 | 1.662704  |
| H | 3.106816  | -2.563901 | 2.536474  | 3.136325  | -2.561265 | 2.520290  | 3.000798  | -2.634385 | 2.568955  |
| H | 4.866623  | -2.499294 | 2.389325  | 4.896985  | -2.475238 | 2.370485  | 4.747942  | -2.597803 | 2.409835  |
| C | 5.146559  | -2.224446 | -0.250524 | 5.162934  | -2.189193 | -0.270247 | 5.019371  | -2.365547 | -0.224192 |
| H | 5.242668  | -3.307574 | -0.419327 | 5.261792  | -3.270606 | -0.450172 | 5.083973  | -3.445031 | -0.378929 |
| H | 6.032623  | -1.904831 | 0.318589  | 6.049127  | -1.869508 | 0.299469  | 5.907554  | -2.061303 | 0.335125  |
| H | 5.186174  | -1.731276 | -1.229098 | 5.193987  | -1.686033 | -1.244191 | 5.067236  | -1.890670 | -1.201607 |
| C | 2.244299  | -3.485895 | -0.825055 | 2.265873  | -3.469854 | -0.835033 | 2.077815  | -3.557401 | -0.762517 |
| H | 3.046180  | -3.834025 | -1.492100 | 3.063005  | -3.806480 | -1.514210 | 2.849850  | -3.924789 | -1.441244 |
| H | 1.313598  | -3.486082 | -1.413664 | 1.326490  | -3.473650 | -1.408958 | 1.137701  | -3.537004 | -1.318342 |
| H | 2.130464  | -4.223215 | -0.015407 | 2.167740  | -4.210995 | -0.026794 | 1.968778  | -4.277926 | 0.051648  |
| C | -1.158608 | 1.875297  | -1.127046 | -1.178960 | 1.864559  | -1.130833 | -1.038987 | 1.859449  | -1.153563 |
| H | -0.988210 | 2.000871  | -2.208559 | -1.008457 | 1.974876  | -2.214142 | -0.882360 | 2.006649  | -2.224139 |
| H | -0.487629 | 1.072944  | -0.785797 | -0.498906 | 1.077245  | -0.773370 | -0.420330 | 1.015445  | -0.848391 |
| C | -0.832273 | 3.181785  | -0.378134 | -0.868533 | 3.188172  | -0.402991 | -0.623337 | 3.116832  | -0.371278 |
| H | -1.103359 | 3.017174  | 0.677557  | -1.151220 | 3.043061  | 0.651551  | -0.869352 | 2.931071  | 0.675494  |
| C | -1.649396 | 4.369901  | -0.905789 | -1.688688 | 4.358928  | -0.963551 | -1.397058 | 4.358790  | -0.833514 |
| H | -1.398390 | 5.286334  | -0.355230 | -1.459210 | 5.286024  | -0.420839 | -1.080803 | 5.237963  | -0.271177 |
| H | -2.733369 | 4.208455  | -0.788430 | -2.770566 | 4.179759  | -0.863546 | -2.472524 | 4.240368  | -0.680448 |
| H | -1.444627 | 4.554410  | -1.971060 | -1.468560 | 4.527408  | -2.028296 | -1.222990 | 4.556512  | -1.893585 |
| C | 0.663440  | 3.441557  | -0.418930 | 0.625216  | 3.457156  | -0.430947 | 0.877693  | 3.320921  | -0.446466 |
| C | 1.406293  | 3.456417  | 0.770884  | 1.361920  | 3.458734  | 0.763467  | 1.644830  | 3.309460  | 0.720208  |
| H | 0.896623  | 3.284352  | 1.723298  | 0.847718  | 3.265137  | 1.709118  | 1.159212  | 3.139883  | 1.674613  |
| C | 2.781548  | 3.705086  | 0.757646  | 2.737415  | 3.709445  | 0.760889  | 3.020615  | 3.516251  | 0.676520  |
| H | 3.340302  | 3.720207  | 1.695302  | 3.291294  | 3.707459  | 1.701804  | 3.596509  | 3.501334  | 1.593659  |
| C | 3.437336  | 3.937777  | -0.453676 | 3.400785  | 3.958092  | -0.443863 | 3.653712  | 3.734283  | -0.542482 |
| H | 4.510646  | 4.134131  | -0.468342 | 4.474946  | 4.151680  | -0.450303 | 4.724450  | 3.890638  | -0.581194 |
| C | 2.710422  | 3.919036  | -1.647789 | 2.680273  | 3.950214  | -1.642747 | 2.901855  | 3.741979  | -1.714364 |
| H | 3.216060  | 4.101522  | -2.597759 | 3.191737  | 4.138941  | -2.588707 | 3.387045  | 3.907421  | -2.668505 |
| C | 1.335043  | 3.674459  | -1.630039 | 1.304712  | 3.703036  | -1.635608 | 1.526323  | 3.539330  | -1.665672 |
| H | 0.781922  | 3.680537  | -2.572643 | 0.756365  | 3.710353  | -2.580721 | 0.956357  | 3.562240  | -2.586847 |
| C | -4.714214 | -0.036149 | -0.020602 | -4.714186 | -0.077386 | -0.011935 | -4.703539 | 0.157359  | -0.059006 |
| H | -5.159435 | 0.067333  | -1.018498 | -5.159032 | 0.024296  | -1.010047 | -5.128077 | 0.256765  | -1.056601 |
| H | -5.066464 | 0.776948  | 0.627267  | -5.072500 | 0.735065  | 0.632942  | -5.025874 | 0.994581  | 0.557499  |
| H | -5.008555 | -1.002013 | 0.407006  | -4.996504 | -1.046667 | 0.415399  | -5.035709 | -0.779302 | 0.384666  |

*trans*-N<sub>endo</sub>-O<sub>exo</sub>-8-R

| Elements | PBE/TZVP  |           |           | PBE/TZVP (CHCl3) |           |           | B3LYP/TZVP (CHCl3) |           |           |
|----------|-----------|-----------|-----------|------------------|-----------|-----------|--------------------|-----------|-----------|
|          | X         | y         | z         | x                | y         | z         | x                  | y         | z         |
| P        | -2.900583 | -0.006851 | -0.140280 | -2.905759        | -0.024625 | -0.136537 | -2.899312          | 0.111262  | -0.159913 |
| P        | -1.179873 | -1.788800 | 0.637379  | -1.169167        | -1.786179 | 0.650471  | -1.290046          | -1.726530 | 0.660286  |
| N        | -2.023525 | -0.313103 | 1.257498  | -2.007442        | -0.311415 | 1.257050  | -2.064111          | -0.223868 | 1.246093  |
| N        | -2.207371 | -1.404502 | -0.763883 | -2.191869        | -1.421400 | -0.751057 | -2.264533          | -1.318414 | -0.752157 |
| N        | -2.543525 | 1.416194  | -0.913096 | -2.556359        | 1.399476  | -0.905892 | -2.447640          | 1.490428  | -0.931885 |
| H        | -3.300487 | 2.032112  | -1.201450 | -3.321485        | 1.981524  | -1.239463 | -3.161566          | 2.110230  | -1.285088 |
| C        | -2.241936 | 0.039118  | 2.691427  | -2.222290        | 0.049207  | 2.689200  | -2.248228          | 0.198256  | 2.664685  |
| C        | -2.716341 | 1.494595  | 2.791011  | -2.724251        | 1.495811  | 2.780949  | -2.708219          | 1.659195  | 2.712021  |
| H        | -2.859664 | 1.761747  | 3.846924  | -2.869963        | 1.761767  | 3.836864  | -2.819113          | 1.966761  | 3.752183  |
| H        | -3.679808 | 1.653991  | 2.284035  | -3.689762        | 1.634992  | 2.273485  | -3.675617          | 1.802261  | 2.228767  |
| H        | -1.977594 | 2.183341  | 2.360653  | -1.997109        | 2.195376  | 2.348531  | -1.982590          | 2.317830  | 2.238244  |
| C        | -3.276037 | -0.907209 | 3.323510  | -3.232887        | -0.911815 | 3.336068  | -3.285276          | -0.703286 | 3.348916  |
| H        | -2.957589 | -1.955439 | 3.227966  | -2.886921        | -1.952634 | 3.256036  | -2.977215          | -1.749508 | 3.311059  |
| H        | -4.262527 | -0.799286 | 2.849247  | -4.219523        | -0.836056 | 2.857249  | -4.260289          | -0.613390 | 2.867041  |
| H        | -3.395492 | -0.685911 | 4.393727  | -3.355858        | -0.673826 | 4.402265  | -3.399614          | -0.420930 | 4.396819  |
| C        | -0.888216 | -0.106006 | 3.401091  | -0.861814        | -0.061659 | 3.391779  | -0.888130          | 0.074967  | 3.360764  |
| H        | -0.518541 | -1.142245 | 3.349043  | -0.466915        | -1.088707 | 3.342910  | -0.527052          | -0.956161 | 3.355939  |
| H        | -0.992615 | 0.150904  | 4.464117  | -0.969695        | 0.198812  | 4.453656  | -0.975831          | 0.385158  | 4.402522  |
| H        | -0.136671 | 0.555817  | 2.950446  | -0.130341        | 0.617551  | 2.934186  | -0.147014          | 0.704209  | 2.869248  |
| C        | -2.188005 | -2.003424 | -2.131905 | -2.178670        | -2.041291 | -2.107918 | -2.269156          | -1.934472 | -2.109915 |
| C        | -1.089100 | -1.358851 | -2.990184 | -1.072542        | -1.420529 | -2.975403 | -1.093247          | -1.405574 | -2.940311 |
| H        | -0.105328 | -1.479679 | -2.520494 | -0.089285        | -1.550782 | -2.507270 | -0.146465          | -1.634430 | -2.456769 |
| H        | -1.277130 | -0.284855 | -3.129765 | -1.246407        | -0.345309 | -3.122316 | -1.160975          | -0.324560 | -3.066511 |
| H        | -1.061528 | -1.829182 | -3.983352 | -1.056297        | -1.901391 | -3.963944 | -1.098624          | -1.865186 | -3.930048 |
| C        | -3.560733 | -1.785268 | -2.783173 | -3.546724        | -1.819316 | -2.767444 | -3.594177          | -1.596234 | -2.802687 |
| H        | -4.366094 | -2.233168 | -2.183610 | -4.358864        | -2.243038 | -2.160184 | -4.446705          | -1.946623 | -2.219268 |
| H        | -3.575044 | -2.257019 | -3.775095 | -3.560723        | -2.313271 | -3.748585 | -3.626264          | -2.084269 | -3.776976 |
| H        | -3.768656 | -0.714331 | -2.934674 | -3.740260        | -0.749723 | -2.941808 | -3.692755          | -0.522191 | -2.976652 |
| C        | -1.927530 | -3.506661 | -1.965651 | -1.933515        | -3.544770 | -1.919031 | -2.157838          | -3.452918 | -1.933828 |
| H        | -2.712576 | -3.981765 | -1.360822 | -2.726677        | -3.999947 | -1.309406 | -2.990640          | -3.838780 | -1.344390 |
| H        | -0.955295 | -3.696439 | -1.486037 | -0.965519        | -3.736862 | -1.431531 | -1.225072          | -3.733102 | -1.440381 |
| H        | -1.906085 | -3.990128 | -2.951856 | -1.913527        | -4.042242 | -2.898276 | -2.168857          | -3.936087 | -2.911414 |
| O        | 0.261858  | -1.166867 | 0.082916  | 0.278821         | -1.165992 | 0.087368  | 0.179429           | -1.189379 | 0.125745  |
| C        | 1.511751  | -1.577335 | 0.735461  | 1.523648         | -1.572553 | 0.735909  | 1.405531           | -1.618554 | 0.776133  |
| H        | 1.259362  | -2.373918 | 1.455673  | 1.278433         | -2.373947 | 1.452914  | 1.141666           | -2.390839 | 1.501973  |
| C        | 2.218221  | -0.376627 | 1.418263  | 2.229744         | -0.373577 | 1.424716  | 2.146944           | -0.431200 | 1.441411  |
| H        | 1.685074  | 0.560553  | 1.203577  | 1.688663         | 0.561079  | 1.221119  | 1.637498           | 0.505866  | 1.221808  |
| H        | 2.253424  | -0.499419 | 2.509759  | 2.270807         | -0.504591 | 2.514908  | 2.185093           | -0.542036 | 2.524779  |
| C        | 3.622323  | -0.390266 | 0.775246  | 3.629819         | -0.373099 | 0.773737  | 3.544324           | -0.487098 | 0.789445  |
| H        | 4.387013  | 0.127586  | 1.370389  | 4.395488         | 0.146676  | 1.366702  | 4.320568           | 0.014126  | 1.367977  |
| C        | 3.874071  | -1.913699 | 0.548127  | 3.891558         | -1.892831 | 0.536101  | 3.757708           | -2.014904 | 0.575545  |
| C        | 2.547942  | -2.099433 | -0.287043 | 2.563119         | -2.083958 | -0.291858 | 2.424839           | -2.176098 | -0.242638 |
| C        | 2.702200  | -1.004482 | -1.376844 | 2.703686         | -0.983571 | -1.377927 | 2.595542           | -1.100965 | -1.347229 |

|   |           |           |           |           |           |           |           |           |           |
|---|-----------|-----------|-----------|-----------|-----------|-----------|-----------|-----------|-----------|
| H | 3.264209  | -1.404613 | -2.232418 | 3.265700  | -1.374930 | -2.238012 | 3.138844  | -1.518951 | -2.195212 |
| H | 1.724975  | -0.684417 | -1.761058 | 1.721031  | -0.670598 | -1.753192 | 1.631831  | -0.763573 | -1.721079 |
| C | 3.462473  | 0.149349  | -0.661360 | 3.457975  | 0.172700  | -0.659711 | 3.386620  | 0.041671  | -0.650292 |
| H | 4.437439  | 0.345323  | -1.128283 | 4.428995  | 0.380391  | -1.131091 | 4.354489  | 0.210312  | -1.122708 |
| H | 2.906234  | 1.096058  | -0.676608 | 2.891813  | 1.113698  | -0.664754 | 2.853174  | 0.989950  | -0.670536 |
| C | 3.941127  | -2.737701 | 1.844208  | 3.972083  | -2.722886 | 1.827459  | 3.820777  | -2.826840 | 1.879235  |
| H | 3.967302  | -3.814594 | 1.618834  | 4.008462  | -3.798099 | 1.594237  | 3.824791  | -3.897641 | 1.662704  |
| H | 3.106816  | -2.563901 | 2.536474  | 3.136325  | -2.561265 | 2.520290  | 3.000798  | -2.634385 | 2.568955  |
| H | 4.866623  | -2.499294 | 2.389325  | 4.896985  | -2.475238 | 2.370485  | 4.747942  | -2.597803 | 2.409835  |
| C | 5.146559  | -2.224446 | -0.250524 | 5.162934  | -2.189193 | -0.270247 | 5.019371  | -2.365547 | -0.224192 |
| H | 5.242668  | -3.307574 | -0.419327 | 5.261792  | -3.270606 | -0.450172 | 5.083973  | -3.445031 | -0.378929 |
| H | 6.032623  | -1.904831 | 0.318589  | 6.049127  | -1.869508 | 0.299469  | 5.907554  | -2.061303 | 0.335125  |
| H | 5.186174  | -1.731276 | -1.229098 | 5.193987  | -1.686033 | -1.244191 | 5.067236  | -1.890670 | -1.201607 |
| C | 2.244299  | -3.485895 | -0.825055 | 2.265873  | -3.469854 | -0.835033 | 2.077815  | -3.557401 | -0.762517 |
| H | 3.046180  | -3.834025 | -1.492100 | 3.063005  | -3.806480 | -1.514210 | 2.849850  | -3.924789 | -1.441244 |
| H | 1.313598  | -3.486082 | -1.413664 | 1.326490  | -3.473650 | -1.408958 | 1.137701  | -3.537004 | -1.318342 |
| H | 2.130464  | -4.223215 | -0.015407 | 2.167740  | -4.210995 | -0.026794 | 1.968778  | -4.277926 | 0.051648  |
| C | -1.158608 | 1.875297  | -1.127046 | -1.178960 | 1.864559  | -1.130833 | -1.038987 | 1.859449  | -1.153563 |
| H | -0.988210 | 2.000871  | -2.208559 | -1.008457 | 1.974876  | -2.214142 | -0.882360 | 2.006649  | -2.224139 |
| H | -0.487629 | 1.072944  | -0.785797 | -0.498906 | 1.077245  | -0.773370 | -0.420330 | 1.015445  | -0.848391 |
| C | -0.832273 | 3.181785  | -0.378134 | -0.868533 | 3.188172  | -0.402991 | -0.623337 | 3.116832  | -0.371278 |
| H | -1.103359 | 3.017174  | 0.677557  | -1.151220 | 3.043061  | 0.651551  | -0.869352 | 2.931071  | 0.675494  |
| C | -1.649396 | 4.369901  | -0.905789 | -1.688688 | 4.358928  | -0.963551 | -1.397058 | 4.358790  | -0.833514 |
| H | -1.398390 | 5.286334  | -0.355230 | -1.459210 | 5.286024  | -0.420839 | -1.080803 | 5.237963  | -0.271177 |
| H | -2.733369 | 4.208455  | -0.788430 | -2.770566 | 4.179759  | -0.863546 | -2.472524 | 4.240368  | -0.680448 |
| H | -1.444627 | 4.554410  | -1.971060 | -1.468560 | 4.527408  | -2.028296 | -1.222990 | 4.556512  | -1.893585 |
| C | 0.663440  | 3.441557  | -0.418930 | 0.625216  | 3.457156  | -0.430947 | 0.877693  | 3.320921  | -0.446466 |
| C | 1.406293  | 3.456417  | 0.770884  | 1.361920  | 3.458734  | 0.763467  | 1.644830  | 3.309460  | 0.720208  |
| H | 0.896623  | 3.284352  | 1.723298  | 0.847718  | 3.265137  | 1.709118  | 1.159212  | 3.139883  | 1.674613  |
| C | 2.781548  | 3.705086  | 0.757646  | 2.737415  | 3.709445  | 0.760889  | 3.020615  | 3.516251  | 0.676520  |
| H | 3.340302  | 3.720207  | 1.695302  | 3.291294  | 3.707459  | 1.701804  | 3.596509  | 3.501334  | 1.593659  |
| C | 3.437336  | 3.937777  | -0.453676 | 3.400785  | 3.958092  | -0.443863 | 3.653712  | 3.734283  | -0.542482 |
| H | 4.510646  | 4.134131  | -0.468342 | 4.474946  | 4.151680  | -0.450303 | 4.724450  | 3.890638  | -0.581194 |
| C | 2.710422  | 3.919036  | -1.647789 | 2.680273  | 3.950214  | -1.642747 | 2.901855  | 3.741979  | -1.714364 |
| H | 3.216060  | 4.101522  | -2.597759 | 3.191737  | 4.138941  | -2.588707 | 3.387045  | 3.907421  | -2.668505 |
| C | 1.335043  | 3.674459  | -1.630039 | 1.304712  | 3.703036  | -1.635608 | 1.526323  | 3.539330  | -1.665672 |
| H | 0.781922  | 3.680537  | -2.572643 | 0.756365  | 3.710353  | -2.580721 | 0.956357  | 3.562240  | -2.586847 |
| C | -4.714214 | -0.036149 | -0.020602 | -4.714186 | -0.077386 | -0.011935 | -4.703539 | 0.157359  | -0.059006 |
| H | -5.159435 | 0.067333  | -1.018498 | -5.159032 | 0.024296  | -1.010047 | -5.128077 | 0.256765  | -1.056601 |
| H | -5.066464 | 0.776948  | 0.627267  | -5.072500 | 0.735065  | 0.632942  | -5.025874 | 0.994581  | 0.557499  |
| H | -5.008555 | -1.002013 | 0.407006  | -4.996504 | -1.046667 | 0.415399  | -5.035709 | -0.779302 | 0.384666  |

## 8-S

*cis*-N<sub>endo</sub>-O<sub>exo</sub>-8-S

| Element | PBE/TZVP |          |          | PBE/TZVP (CHCl3) |           |           | B3LYP/TZVP (CHCl3) |           |           |
|---------|----------|----------|----------|------------------|-----------|-----------|--------------------|-----------|-----------|
|         | X        | Y        | Z        | x                | Y         | z         | x                  | Y         | z         |
| P       | 2.854941 | 0.185319 | 0.245598 | -2.854318        | 0.004220  | -0.238402 | -2.831713          | 0.418472  | -0.232669 |
| P       | 1.364868 | -1.84685 | -0.37079 | -1.229797        | -1.933378 | 0.342162  | -1.564651          | -1.676991 | 0.557294  |
| O       | -0.15619 | -1.25468 | -0.03981 | 0.269236         | -1.256989 | 0.033498  | -0.025994          | -1.289062 | 0.088058  |
| N       | 2.160016 | -0.41907 | -1.15039 | -2.096334        | -0.570758 | 1.142913  | -2.172228          | -0.117491 | 1.197595  |
| N       | 2.240377 | -1.17706 | 1.026073 | -2.130639        | -1.292635 | -1.043254 | -2.429142          | -1.084969 | -0.861657 |
| N       | 2.280597 | 1.698917 | 0.627087 | -2.404088        | 1.563228  | -0.594647 | -2.063334          | 1.766430  | -0.795536 |
| H       | 2.867615 | 2.306542 | 1.197576 | -3.041846        | 2.116293  | -1.167388 | -2.549263          | 2.337968  | -1.474677 |
| C       | 2.488869 | -0.25475 | -2.59698 | -2.428295        | -0.446546 | 2.592366  | -2.392333          | 0.273648  | 2.618809  |
| C       | 2.750916 | 1.229006 | -2.88407 | -2.732939        | 1.023343  | 2.906138  | -2.436595          | 1.801780  | 2.715468  |
| H       | 1.878725 | 1.841444 | -2.62091 | -1.870166        | 1.659041  | 2.668433  | -1.509198          | 2.239315  | 2.349132  |
| H       | 2.960534 | 1.366023 | -3.95378 | -2.960706        | 1.130451  | 3.975611  | -2.570025          | 2.097321  | 3.756523  |
| H       | 3.620786 | 1.611684 | -2.3295  | -3.602009        | 1.395553  | 2.343819  | -3.265403          | 2.225994  | 2.146536  |
| C       | 3.714144 | -1.10613 | -2.9668  | -3.626840        | -1.339230 | 2.950865  | -3.700296          | -0.340590 | 3.135625  |
| H       | 3.540818 | -2.16543 | -2.7275  | -3.421443        | -2.388959 | 2.695622  | -3.680128          | -1.427266 | 3.036357  |
| H       | 4.613832 | -0.77116 | -2.43005 | -4.536000        | -1.022796 | 2.420209  | -4.561912          | 0.039303  | 2.583900  |
| H       | 3.92309  | -1.03124 | -4.04349 | -3.832015        | -1.283298 | 4.029571  | -3.842837          | -0.096312 | 4.189657  |
| C       | 1.262501 | -0.72244 | -3.39326 | -1.187520        | -0.891006 | 3.378958  | -1.204554          | -0.251529 | 3.433003  |
| H       | 0.376485 | -0.12567 | -3.13912 | -0.322439        | -0.259458 | 3.137575  | -0.268987          | 0.175732  | 3.074008  |
| H       | 1.039859 | -1.78376 | -3.20043 | -0.930263        | -1.940495 | 3.165513  | -1.135827          | -1.340851 | 3.384640  |
| H       | 1.456002 | -0.61949 | -4.46968 | -1.386360        | -0.813497 | 4.456436  | -1.329902          | 0.021488  | 4.481150  |
| C       | 2.127912 | -1.55731 | 2.464596 | -2.004993        | -1.649388 | -2.484800 | -2.439289          | -1.621359 | -2.251341 |
| C       | 0.922899 | -0.86627 | 3.120849 | -0.858905        | -0.862364 | -3.139941 | -1.216897          | -1.122893 | -3.032410 |
| H       | -0.0061  | -1.11467 | 2.593472 | 0.087780         | -1.041422 | -2.615239 | -0.296843          | -1.427430 | -2.538962 |
| H       | 1.043645 | 0.227086 | 3.113764 | -1.065680        | 0.217656  | -3.123599 | -1.221977          | -0.034372 | -3.112601 |
| H       | 0.826937 | -1.1859  | 4.168227 | -0.742361        | -1.167820 | -4.189532 | -1.224644          | -1.534794 | -4.042937 |
| C       | 3.421824 | -1.1488  | 3.182585 | -3.331481        | -1.332576 | -3.189171 | -3.728690          | -1.163925 | -2.943479 |
| H       | 4.303102 | -1.61785 | 2.722605 | -4.169611        | -1.870562 | -2.724598 | -4.610140          | -1.472683 | -2.379808 |
| H       | 3.376202 | -1.46754 | 4.232833 | -3.267964        | -1.638744 | -4.242291 | -3.784192          | -1.606755 | -3.938162 |
| H       | 3.552538 | -0.05475 | 3.187869 | -3.545722        | -0.252849 | -3.180330 | -3.751024          | -0.079598 | -3.074578 |
| C       | 1.967882 | -3.08288 | 2.519804 | -1.732129        | -3.158141 | -2.558976 | -2.425715          | -3.151092 | -2.158213 |
| H       | 2.82905  | -3.58909 | 2.061668 | -2.554822        | -3.729758 | -2.107189 | -3.292524          | -3.515394 | -1.605134 |
| H       | 1.054416 | -3.41154 | 2.001483 | -0.797538        | -3.425480 | -2.043156 | -1.521904          | -3.515267 | -1.666191 |
| H       | 1.886547 | -3.4096  | 3.565452 | -1.627796        | -3.462624 | -3.609258 | -2.447436          | -3.578909 | -3.160992 |
| C       | -1.32235 | -1.86359 | -0.68713 | 1.453443         | -1.850402 | 0.647192  | 1.135005           | -1.818783 | 0.778155  |
| H       | -0.97293 | -2.76712 | -1.21461 | 1.145840         | -2.800951 | 1.113964  | 0.788458           | -2.586805 | 1.473160  |
| C       | -2.03034 | -0.86768 | -1.64516 | 2.116581         | -0.891750 | 1.674427  | 1.933908           | -0.704570 | 1.505856  |
| H       | -1.56394 | 0.126399 | -1.57953 | 1.606206         | 0.082219  | 1.673415  | 1.501148           | 0.274036  | 1.301336  |
| H       | -1.96424 | -1.19995 | -2.69056 | 2.059820         | -1.296609 | 2.694316  | 1.926497           | -0.851258 | 2.585492  |
| C       | -3.48271 | -0.85063 | -1.11848 | 3.568723         | -0.776539 | 1.160193  | 3.348012           | -0.840714 | 0.903559  |
| H       | -4.2195  | -0.51561 | -1.86155 | 4.289078         | -0.461350 | 1.928246  | 4.133666           | -0.409111 | 1.524040  |
| C       | -3.67208 | -2.31349 | -0.6085  | 3.824309         | -2.191089 | 0.553385  | 3.462696           | -2.374415 | 0.658243  |

|   |          |          |          |           |           |           |           |           |           |
|---|----------|----------|----------|-----------|-----------|-----------|-----------|-----------|-----------|
| C | -2.41434 | -2.2405  | 0.341414 | 2.567995  | -2.109909 | -0.395932 | 2.155704  | -2.422158 | -0.214146 |
| C | -2.71516 | -0.96366 | 1.172734 | 2.812699  | -0.767956 | -1.138574 | 2.445254  | -1.336194 | -1.282530 |
| H | -3.32155 | -1.22284 | 2.051951 | 3.431423  | -0.938883 | -2.031095 | 2.991294  | -1.771246 | -2.120039 |
| H | -1.79045 | -0.50606 | 1.547527 | 1.867061  | -0.329400 | -1.483037 | 1.522669  | -0.923483 | -1.682864 |
| C | -3.47754 | -0.03034 | 0.188073 | 3.532958  | 0.128306  | -0.089086 | 3.285142  | -0.268712 | -0.526870 |
| H | -2.98105 | 0.940824 | 0.05598  | 2.992713  | 1.065265  | 0.104486  | 2.821596  | 0.716048  | -0.543712 |
| H | -4.49846 | 0.179994 | 0.535018 | 4.545500  | 0.403680  | -0.416390 | 4.280702  | -0.157877 | -0.956564 |
| C | -3.58537 | -3.37796 | -1.71426 | 3.782356  | -3.330494 | 1.584262  | 3.416732  | -3.220655 | 1.940375  |
| H | -2.70982 | -3.2818  | -2.36972 | 2.900791  | -3.314552 | 2.237775  | 2.583746  | -2.990247 | 2.602301  |
| H | -4.47625 | -3.32004 | -2.35728 | 4.669153  | -3.276384 | 2.234033  | 4.334554  | -3.069915 | 2.513535  |
| H | -3.56607 | -4.3888  | -1.27951 | 3.806220  | -4.308966 | 1.080391  | 3.356666  | -4.283185 | 1.693804  |
| C | -4.98995 | -2.5477  | 0.141439 | 5.153733  | -2.315193 | -0.203006 | 4.728676  | -2.793173 | -0.101259 |
| H | -5.84026 | -2.4018  | -0.54181 | 5.994487  | -2.174492 | 0.493729  | 5.612033  | -2.566103 | 0.500726  |
| H | -5.13593 | -1.88007 | 0.999017 | 5.268183  | -1.586892 | -1.014996 | 4.849726  | -2.298879 | -1.062589 |
| H | -5.04529 | -3.5824  | 0.511826 | 5.255407  | -3.320238 | -0.640165 | 4.724687  | -3.870398 | -0.282835 |
| C | -2.08857 | -3.46979 | 1.170072 | 2.302340  | -3.293065 | -1.308805 | 1.736748  | -3.762673 | -0.784782 |
| H | -1.21548 | -3.29054 | 1.816529 | 1.425773  | -3.107113 | -1.947690 | 0.830535  | -3.660815 | -1.385853 |
| H | -1.86523 | -4.34253 | 0.537157 | 2.112126  | -4.214053 | -0.736364 | 1.535669  | -4.491064 | 0.004453  |
| H | -2.92787 | -3.73367 | 1.829656 | 3.157615  | -3.474567 | -1.976319 | 2.514313  | -4.170038 | -1.433821 |
| C | 0.839674 | 2.024994 | 0.573857 | -0.997046 | 2.000930  | -0.556146 | -0.596493 | 1.906784  | -0.729896 |
| H | 0.31841  | 1.62893  | 1.459875 | -0.465506 | 1.687964  | -1.469325 | -0.114651 | 1.308068  | -1.506004 |
| H | 0.419817 | 1.503898 | -0.29901 | -0.517253 | 1.482790  | 0.287148  | -0.277637 | 1.496951  | 0.226851  |
| C | 0.575002 | 3.538209 | 0.46523  | -0.861666 | 3.526857  | -0.392747 | -0.133521 | 3.367294  | -0.854049 |
| H | 0.946774 | 4.006854 | 1.395053 | -1.305077 | 3.994039  | -1.290041 | -0.358672 | 3.699298  | -1.872757 |
| C | 1.292953 | 4.194957 | -0.71933 | -1.593504 | 4.071950  | 0.840399  | -0.847429 | 4.314388  | 0.117921  |
| H | 1.075679 | 5.270962 | -0.74702 | -1.514303 | 5.167122  | 0.874800  | -0.483386 | 5.333299  | -0.018786 |
| H | 0.971357 | 3.765839 | -1.67906 | -1.164665 | 3.676759  | 1.772198  | -0.673447 | 4.034167  | 1.157185  |
| H | 2.3831   | 4.069102 | -0.65231 | -2.659148 | 3.803477  | 0.823887  | -1.925250 | 4.312916  | -0.047173 |
| C | -0.93569 | 3.729658 | 0.442285 | 0.621514  | 3.865289  | -0.393422 | 1.378093  | 3.387624  | -0.688733 |
| C | -1.6788  | 3.528779 | -0.73179 | 1.437570  | 3.535252  | 0.701367  | 1.966979  | 3.207286  | 0.567024  |
| H | -1.17299 | 3.271048 | -1.66528 | 1.004838  | 3.046619  | 1.578091  | 1.345014  | 3.066888  | 1.442835  |
| C | -3.06873 | 3.669318 | -0.73048 | 2.804307  | 3.823884  | 0.688237  | 3.349555  | 3.202487  | 0.713339  |
| H | -3.62943 | 3.518168 | -1.65494 | 3.422341  | 3.560053  | 1.548900  | 3.785523  | 3.058717  | 1.694336  |
| C | -3.74038 | 4.00409  | 0.448677 | 3.381592  | 4.443351  | -0.425085 | 4.171278  | 3.371358  | -0.397646 |
| H | -4.82575 | 4.117361 | 0.448751 | 4.449575  | 4.668719  | -0.435655 | 5.248219  | 3.364595  | -0.285268 |
| C | -3.01285 | 4.198587 | 1.625365 | 2.581389  | 4.771751  | -1.522896 | 3.598596  | 3.541606  | -1.653587 |
| H | -3.5276  | 4.466661 | 2.549819 | 3.021858  | 5.256643  | -2.396437 | 4.228633  | 3.670483  | -2.525153 |
| C | -1.62202 | 4.061829 | 1.618991 | 1.212946  | 4.483117  | -1.504567 | 2.213028  | 3.548548  | -1.795083 |
| H | -1.05854 | 4.227106 | 2.54164  | 0.591972  | 4.744908  | -2.365516 | 1.775854  | 3.685069  | -2.777885 |
| C | 4.664244 | 0.334916 | 0.325563 | -4.665526 | 0.004308  | -0.300118 | -4.595408 | 0.801452  | -0.287295 |
| H | 4.972868 | 0.683674 | 1.319961 | -5.009106 | 0.404290  | -1.262770 | -4.871703 | 1.122669  | -1.290396 |
| H | 5.012345 | 1.044924 | -0.43545 | -5.060458 | 0.626678  | 0.512810  | -4.813121 | 1.602942  | 0.416466  |
| H | 5.097925 | -0.65527 | 0.142507 | -5.011916 | -1.029701 | -0.189165 | -5.151952 | -0.095619 | -0.025697 |

*trans*-N<sub>endo</sub>-O<sub>exo</sub>-8-S

| Element | PBE/TZVP  |           |           | PBE/TZVP (CHCl3) |           |           | B3LYP/TZVP (CHCl3) |           |           |
|---------|-----------|-----------|-----------|------------------|-----------|-----------|--------------------|-----------|-----------|
|         | X         | y         | z         | x                | y         | z         | x                  | y         | z         |
| P       | 0.809632  | -0.031261 | 1.409562  | -0.817569        | 0.062433  | -1.474827 | -0.803501          | 0.092925  | -1.454470 |
| P       | -0.777940 | 0.195661  | -0.627302 | 0.749405         | 0.186464  | 0.587462  | 0.729355           | 0.182128  | 0.613627  |
| O       | -2.269648 | 0.024821  | 0.105079  | 2.261964         | 0.017514  | -0.120028 | 2.234856           | 0.042260  | -0.067190 |
| N       | 0.149028  | -1.059080 | 0.260117  | -0.171059        | -1.018065 | -0.361887 | -0.164091          | -0.999709 | -0.367466 |
| N       | 0.128811  | 1.226833  | 0.535296  | -0.112684        | 1.273161  | -0.545206 | -0.121898          | 1.280020  | -0.499200 |
| N       | 2.459040  | -0.127571 | 1.556573  | -2.469216        | -0.011822 | -1.598308 | -2.442243          | 0.032083  | -1.585635 |
| H       | 2.837292  | 0.012106  | 2.492668  | -2.861458        | 0.222460  | -2.510458 | -2.835002          | 0.250528  | -2.491671 |
| C       | -0.032411 | -2.541026 | 0.203559  | -0.020733        | -2.503175 | -0.350934 | -0.027590          | -2.484587 | -0.387403 |
| C       | 1.259138  | -3.215415 | 0.682447  | -1.303236        | -3.139047 | -0.901272 | -1.305662          | -3.094349 | -0.970705 |
| H       | 2.116891  | -2.916220 | 0.066026  | -2.176990        | -2.849111 | -0.303750 | -2.178502          | -2.804350 | -0.388314 |
| H       | 1.148282  | -4.306173 | 0.613007  | -1.207068        | -4.232808 | -0.863446 | -1.225430          | -4.181572 | -0.952899 |
| H       | 1.485550  | -2.974563 | 1.731903  | -1.486206        | -2.859685 | -1.949274 | -1.466067          | -2.794508 | -2.007671 |
| C       | -1.217104 | -2.983835 | 1.076733  | 1.187468         | -2.937992 | -1.195063 | 1.186987           | -2.898811 | -1.227660 |
| H       | -2.140669 | -2.475273 | 0.775643  | 2.110436         | -2.473499 | -0.828517 | 2.098155           | -2.450842 | -0.839098 |
| H       | -1.034045 | -2.763175 | 2.138735  | 1.055308         | -2.655163 | -2.249293 | 1.068630           | -2.582873 | -2.265529 |
| H       | -1.368685 | -4.068654 | 0.984671  | 1.302327         | -4.030328 | -1.149584 | 1.297440           | -3.984302 | -1.215725 |
| C       | -0.281541 | -2.901087 | -1.267675 | 0.165360         | -2.920995 | 1.114345  | 0.136454           | -2.948915 | 1.064128  |
| H       | 0.568102  | -2.599887 | -1.896452 | -0.705581        | -2.629533 | 1.718010  | -0.728004          | -2.659233 | 1.663206  |
| H       | -1.190367 | -2.417973 | -1.656766 | 1.063738         | -2.464571 | 1.556544  | 1.032340           | -2.529481 | 1.525160  |
| H       | -0.420093 | -3.986403 | -1.365103 | 0.285682         | -4.011169 | 1.174095  | 0.231442           | -4.034818 | 1.091731  |
| C       | 0.372768  | 2.696528  | 0.460095  | -0.324407        | 2.744325  | -0.429990 | -0.306219          | 2.754911  | -0.394591 |
| C       | 1.187142  | 3.021539  | -0.802055 | -1.122076        | 3.053954  | 0.846803  | -1.089247          | 3.082107  | 0.883892  |
| H       | 0.660595  | 2.684305  | -1.706707 | -0.597892        | 2.677852  | 1.737464  | -0.563797          | 2.717881  | 1.768397  |
| H       | 2.173440  | 2.537835  | -0.779183 | -2.120059        | 2.595594  | 0.815215  | -2.080266          | 2.628291  | 0.864178  |
| H       | 1.340963  | 4.106583  | -0.887408 | -1.246912        | 4.140123  | 0.960502  | -1.208850          | 4.161957  | 0.984473  |
| C       | 1.133494  | 3.141222  | 1.716780  | -1.087800        | 3.236077  | -1.667439 | -1.073470          | 3.253898  | -1.624672 |
| H       | 0.558672  | 2.926732  | 2.630071  | -0.524461        | 3.036692  | -2.590816 | -0.522608          | 3.051470  | -2.545130 |
| H       | 1.298300  | 4.226437  | 1.678354  | -1.234089        | 4.322176  | -1.594009 | -1.207421          | 4.333193  | -1.550476 |
| H       | 2.121744  | 2.663056  | 1.787220  | -2.083064        | 2.773935  | -1.742696 | -2.065111          | 2.803495  | -1.693435 |
| C       | -0.987781 | 3.404502  | 0.402524  | 1.050604         | 3.423722  | -0.366460 | 1.076505           | 3.413886  | -0.350280 |
| H       | -1.594315 | 3.166059  | 1.286556  | 1.644683         | 3.189557  | -1.260045 | 1.650707           | 3.165706  | -1.242939 |
| H       | -1.552366 | 3.107520  | -0.493945 | 1.613930         | 3.097786  | 0.520549  | 1.642555           | 3.088151  | 0.524068  |
| H       | -0.845134 | 4.493187  | 0.356644  | 0.928527         | 4.513852  | -0.299216 | 0.972038           | 4.498117  | -0.290764 |
| C       | -3.450643 | 0.468359  | -0.650819 | 3.423572         | 0.434112  | 0.666655  | 3.405126           | 0.417372  | 0.712170  |
| H       | -3.110204 | 0.709691  | -1.672087 | 3.063688         | 0.678689  | 1.680338  | 3.068733           | 0.615509  | 1.732178  |
| C       | -4.150560 | 1.677449  | 0.025003  | 4.165461         | 1.633538  | 0.015949  | 4.141001           | 1.640947  | 0.106346  |
| H       | -3.681556 | 1.900519  | 0.993491  | 3.721579         | 1.874781  | -0.959810 | 3.684562           | 1.927593  | -0.839952 |
| H       | -4.077886 | 2.582647  | -0.593921 | 4.098092         | 2.534462  | 0.641192  | 4.091480           | 2.504025  | 0.769796  |
| C       | -5.606736 | 1.190331  | 0.192719  | 5.614181         | 1.117672  | -0.123708 | 5.582716           | 1.124013  | -0.082487 |
| H       | -6.337847 | 2.003815  | 0.295373  | 6.364894         | 1.915991  | -0.207132 | 6.330782           | 1.914941  | -0.140748 |
| C       | -5.801620 | 0.274689  | -1.055063 | 5.764735         | 0.193965  | 1.123791  | 5.749812           | 0.141854  | 1.112950  |
| C       | -4.548545 | -0.619835 | -0.707456 | 4.502775         | -0.674062 | 0.747083  | 4.478062           | -0.695438 | 0.719584  |
| C       | -4.849390 | -1.037713 | 0.757842  | 4.828714         | -1.095275 | -0.711614 | 4.772403           | -1.050310 | -0.761781 |

|   |           |           |           |           |           |           |           |           |           |
|---|-----------|-----------|-----------|-----------|-----------|-----------|-----------|-----------|-----------|
| H | -5.458798 | -1.952180 | 0.770952  | 5.424245  | -2.019316 | -0.712641 | 5.357296  | -1.968602 | -0.818854 |
| H | -3.923782 | -1.264738 | 1.303144  | 3.910954  | -1.305041 | -1.275733 | 3.851387  | -1.223206 | -1.314140 |
| C | -5.610440 | 0.180972  | 1.358967  | 5.622094  | 0.112054  | -1.293765 | 5.563249  | 0.178116  | -1.299373 |
| H | -5.114111 | 0.592322  | 2.249983  | 5.146552  | 0.535969  | -2.190272 | 5.077898  | 0.643395  | -2.158708 |
| H | -6.633296 | -0.085762 | 1.657385  | 6.645822  | -0.172206 | -1.574738 | 6.571511  | -0.096111 | -1.609910 |
| C | -5.712450 | 1.019923  | -2.396694 | 5.661477  | 0.936674  | 2.465624  | 5.681571  | 0.818986  | 2.491136  |
| H | -4.835723 | 1.673164  | -2.496519 | 4.791161  | 1.600156  | 2.548361  | 4.823778  | 1.475024  | 2.628156  |
| H | -6.601953 | 1.653595  | -2.529495 | 6.558117  | 1.557155  | 2.615862  | 6.577625  | 1.424174  | 2.647218  |
| H | -5.694857 | 0.308249  | -3.235960 | 5.616086  | 0.221084  | 3.300718  | 5.652661  | 0.068472  | 3.284280  |
| C | -7.124005 | -0.503787 | -1.059115 | 7.071852  | -0.609694 | 1.152971  | 7.054138  | -0.666478 | 1.083091  |
| H | -7.970382 | 0.197723  | -1.109915 | 7.929610  | 0.075860  | 1.231780  | 7.908802  | 0.008985  | 1.169137  |
| H | -7.270342 | -1.135176 | -0.174506 | 7.225756  | -1.234999 | 0.265147  | 7.188750  | -1.254187 | 0.177675  |
| H | -7.187641 | -1.153266 | -1.945050 | 7.098521  | -1.269746 | 2.033340  | 7.094639  | -1.354773 | 1.930298  |
| C | -4.241691 | -1.774947 | -1.643238 | 4.152433  | -1.825491 | 1.672170  | 4.134083  | -1.885820 | 1.593517  |
| H | -3.385919 | -2.364494 | -1.281546 | 3.290082  | -2.392419 | 1.291151  | 3.261304  | -2.415606 | 1.208659  |
| H | -4.005010 | -1.424853 | -2.659972 | 3.901654  | -1.471823 | 2.684192  | 3.915063  | -1.580660 | 2.619548  |
| H | -5.097474 | -2.462093 | -1.711418 | 4.992106  | -2.531379 | 1.754277  | 4.960080  | -2.599066 | 1.619721  |
| C | 3.415362  | 0.030043  | 0.444721  | -3.390705 | 0.081634  | -0.453733 | -3.365434 | 0.097202  | -0.441111 |
| H | 3.507669  | 1.092480  | 0.166622  | -3.458790 | 1.121918  | -0.096245 | -3.432381 | 1.120798  | -0.066124 |
| H | 3.012906  | -0.507225 | -0.427431 | -2.975289 | -0.522822 | 0.366796  | -2.955431 | -0.520958 | 0.358966  |
| C | 4.812247  | -0.507389 | 0.808501  | -4.806308 | -0.403818 | -0.820469 | -4.776272 | -0.381206 | -0.822578 |
| H | 5.140007  | 0.036316  | 1.714428  | -5.155133 | 0.229649  | -1.655720 | -5.116931 | 0.258284  | -1.643960 |
| C | 4.819326  | -2.009460 | 1.120494  | -4.846852 | -1.867317 | -1.280497 | -4.808008 | -1.835284 | -1.309244 |
| H | 5.826657  | -2.329480 | 1.418102  | -5.865794 | -2.137806 | -1.589336 | -5.816985 | -2.101203 | -1.626352 |
| H | 4.531023  | -2.601191 | 0.239602  | -4.550188 | -2.551161 | -0.472491 | -4.515107 | -2.526167 | -0.517484 |
| H | 4.126030  | -2.260503 | 1.936555  | -4.173560 | -2.039902 | -2.132084 | -4.133688 | -1.987368 | -2.153057 |
| C | 5.778078  | -0.131919 | -0.304744 | -5.730945 | -0.135988 | 0.356604  | -5.711401 | -0.141997 | 0.350014  |
| C | 5.665195  | -0.702979 | -1.582465 | -5.578657 | -0.828749 | 1.569218  | -5.556472 | -0.843730 | 1.549630  |
| H | 4.891228  | -1.448162 | -1.785067 | -4.798446 | -1.587336 | 1.672296  | -4.769845 | -1.582700 | 1.648443  |
| C | 6.543227  | -0.339974 | -2.605937 | -6.420104 | -0.565721 | 2.653045  | -6.406258 | -0.611171 | 2.625740  |
| H | 6.444884  | -0.796273 | -3.592718 | -6.288182 | -1.114962 | 3.587479  | -6.271970 | -1.165361 | 3.546720  |
| C | 7.550303  | 0.599868  | -2.366631 | -7.431381 | 0.394565  | 2.541824  | -7.429344 | 0.328026  | 2.519958  |
| H | 8.239601  | 0.879815  | -3.164992 | -8.090659 | 0.597812  | 3.387761  | -8.092790 | 0.507430  | 3.356839  |
| C | 7.672901  | 1.173940  | -1.099136 | -7.593197 | 1.089758  | 1.340223  | -7.593787 | 1.031975  | 1.331449  |
| H | 8.460041  | 1.904011  | -0.902076 | -8.381178 | 1.839228  | 1.242578  | -8.387705 | 1.762919  | 1.238168  |
| C | 6.790224  | 0.810799  | -0.078101 | -6.746725 | 0.825829  | 0.258731  | -6.738674 | 0.798059  | 0.257393  |
| H | 6.895042  | 1.260544  | 0.913146  | -6.878287 | 1.372669  | -0.678802 | -6.874290 | 1.351248  | -0.665240 |
| C | 0.196937  | -0.200678 | 3.115423  | -0.218295 | -0.036206 | -3.184972 | -0.185733 | 0.025524  | -3.153299 |
| H | 0.573558  | 0.621746  | 3.739046  | -0.587268 | 0.823170  | -3.760663 | -0.553771 | 0.884960  | -3.713107 |
| H | 0.507329  | -1.163963 | 3.541842  | -0.552827 | -0.969776 | -3.655435 | -0.509147 | -0.893911 | -3.639888 |
| H | -0.898250 | -0.149342 | 3.068553  | 0.877466  | -0.004624 | -3.145659 | 0.901177  | 0.062006  | -3.104459 |
